# Supplementary material for: Photoredox catalyzed visible light-induced reduction of nitroarenes into anilines
Source: Royal Society of Chemistry journal article supplement (doi:10.1039/d5qo01565k), 2025-12-24
Supplement: d5qo01565k1.pdf [file d5qo01565k1.pdf]

## Supplementary Information

### Photoredox Catalyzed Visible Light-Induced Reduction of Nitroarenes into Anilines

Weiqiang Sun,<sup>a</sup> Hao Guo,<sup>\*a</sup> Aishun Ding,<sup>\*a</sup>

<sup>a</sup> Department of Chemistry, Fudan University, 2005 Songhu Road, Shanghai 200438, PR China, E-mail: Hao\_Guo@fudan.edu.cn, dingaishun@fudan.edu.cn

### Contents

|                                                                                      |     |
|--------------------------------------------------------------------------------------|-----|
| Experimental Section .....                                                           | S2  |
| General information .....                                                            | S2  |
| Figure S1. Spectral distribution of irradiance density for the purple LED strip..... | S3  |
| Figure S2. General setup for the photoreaction .....                                 | S3  |
| Typical Procedure for the photoreaction.....                                         | S4  |
| Gram-scale reaction of <b>1aa</b> .....                                              | S13 |
| Mechanism studies.....                                                               | S14 |
| NMR spectra .....                                                                    | S19 |
| References.....                                                                      | S35 |

## Experimental Section

### General information

All the photo reactions were carried out using purple LED strip ( $\lambda = 415$  nm, height: 10 cm, diameter: 15 cm, 30 W, manufacturer: Xuzhou Ai Jia Electronic Technology Co. LTD, model: DT 415) at a distance of 3-5 cm at rt (maintained with three cooling fans) unless stated otherwise.  $^1\text{H}$  (400 MHz) NMR spectra of samples in  $\text{CDCl}_3$  or  $\text{DMSO}-d_6$  or methanol- $d_4$  were recorded on an AVANCE III 400 spectrometer. Anhydrous *n*-hexane, ethyl ether, and EtOH were commercially available. Anhydrous DCM, DCE, MeCN, and toluene were distilled with  $\text{CaH}_2$ . Anhydrous THF was distilled with Na using benzophenone as a monitor. **1a, 1b, 1c, 1d, 1f, 1g, 1h, 1i, 1j, 1k, 1l, 1m, 1n, 1o, 1p, 1q, 1r, 1s, 1t, 1u, 1v, 1w, 1x, 1y, 1z, 1aa, 1ab, and 1ac** were commercially available and used as purchased without further purification. **1e<sup>1</sup>** was synthesized according to literature procedures.

**Figure S1. Spectral distribution of irradiance density for the purple LED strip**

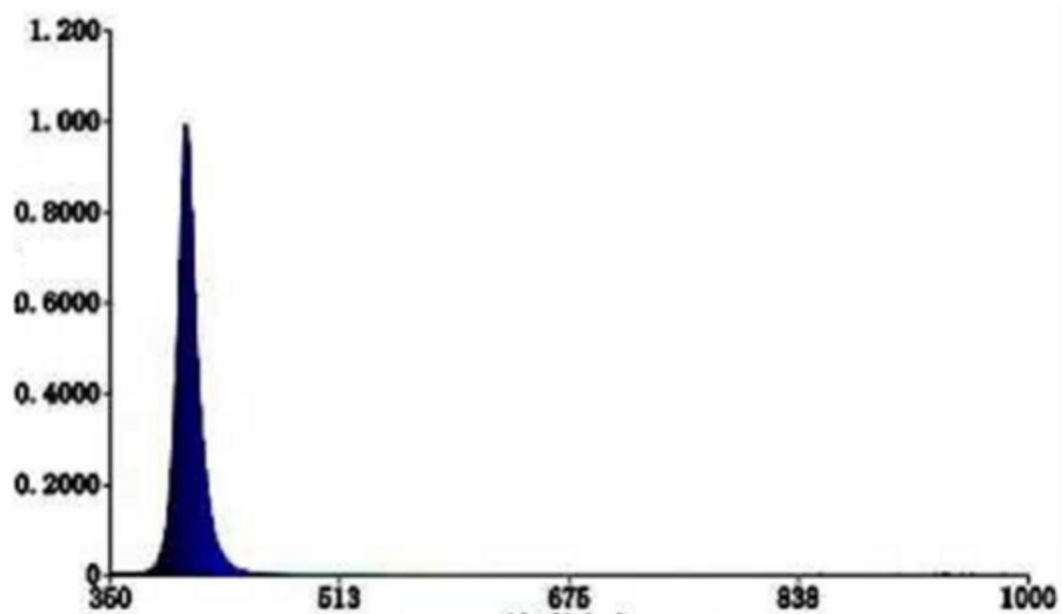

**Figure S2. General setup for the photoreaction**

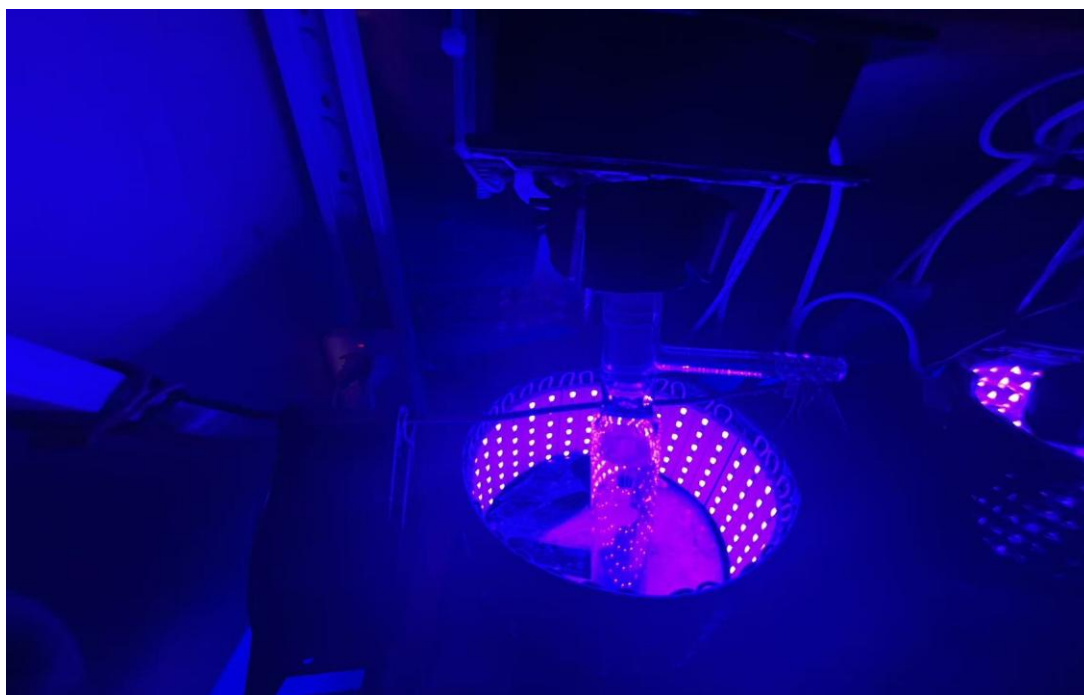

## Typical Procedure for the photoreaction

### Synthesis of 4-(methoxycarbonyl)aniline (**2a**)

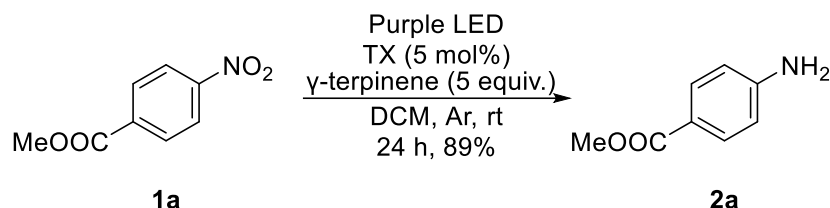

To a flame dried 25 mL of Pyrex sealed tube were added TX (2.1 mg, 0.01 mmol), **1a** (36.3 mg, 0.2 mmol), anhydrous DCM (20 mL), and  $\gamma$ -terpinene (160  $\mu$ L, 1.0 mmol). The reaction mixture was irradiated by purple LED strip ( $\lambda = 415$  nm, height: 10 cm, diameter: 15 cm, 30 W) at a distance of 3-5 cm under argon atmosphere at rt (maintained with three cooling fans). The reaction was completed after 24 h as monitored by TLC (eluent: petroleum ether/ethyl acetate = 50:1). The solvent was removed, and the residue was purified by flash chromatography on silica gel (eluent: DCM) to afford **2a**<sup>2</sup> as a solid (27.1 mg, 89%). <sup>1</sup>H NMR (400 MHz, CDCl<sub>3</sub>)  $\delta$  7.85 (d,  $J = 8.4$  Hz, 2 H), 6.64 (d,  $J = 8.4$  Hz, 2 H), 4.03 (brs, 2 H), 3.85 (s, 3 H).

The following compounds were synthesized according to Typical Procedure.

#### 1) 4-Methoxyaniline (**2b**)

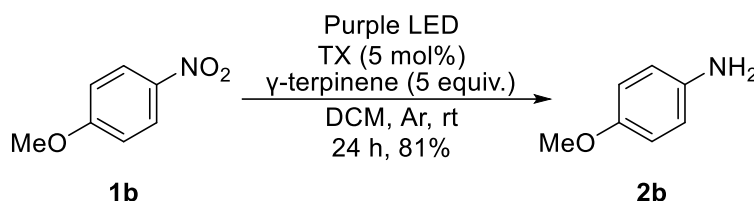

The reaction of **1b** (30.7 mg, 0.2 mmol), TX (2.1 mg, 0.01 mmol),  $\gamma$ -terpinene (160  $\mu$ L, 1.0 mmol), and anhydrous DCM (20 mL) afforded **2b**<sup>2</sup> as a white solid (20.1 mg, 81%). <sup>1</sup>H NMR (400 MHz, CDCl<sub>3</sub>)  $\delta$  6.74 (d,  $J = 8.8$  Hz, 2 H), 6.64 (d,  $J = 8.8$  Hz, 2 H), 3.74 (s, 3 H), 3.41 (brs, 2 H).

#### 2) 3-Methoxyaniline (**2c**)

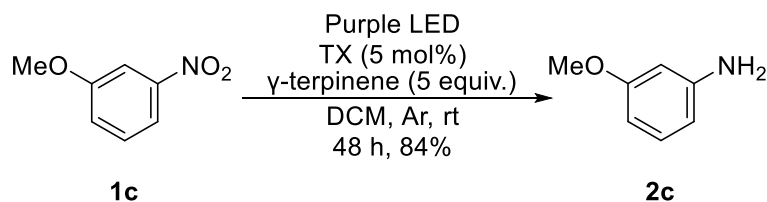

The reaction of **1c** (30.5 mg, 0.2 mmol), TX (2.1 mg, 0.01 mmol),  $\gamma$ -terpinene (160  $\mu$ L,

1.0 mmol), and anhydrous DCM (20 mL) afforded **2c**<sup>3</sup> as a liquid (20.7 mg, 84%). <sup>1</sup>H NMR (400 MHz, CDCl<sub>3</sub>)  $\delta$  7.06 (dd,  $J$  = 8.0, 8.0 Hz, 1 H), 6.35-6.22 (m, 3 H), 3.76 (s, 3 H), 3.65 (brs, 2 H).

### 3) 2-Methoxyaniline (**2d**)

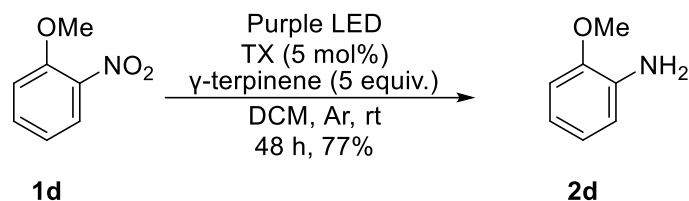

The reaction of **1d** (30.3 mg, 0.2 mmol), TX (2.1 mg, 0.01 mmol),  $\gamma$ -terpinene (160  $\mu$ L, 1.0 mmol), and anhydrous DCM (20 mL) afforded **2d**<sup>3</sup> as a liquid (18.9 mg, 77%). <sup>1</sup>H NMR (400 MHz, CDCl<sub>3</sub>)  $\delta$  6.82-6.69 (m, 4 H), 3.84 (s, 3 H), 3.46 (brs, 2 H).

### 4) 4-Acetoxyaniline (**2e**)

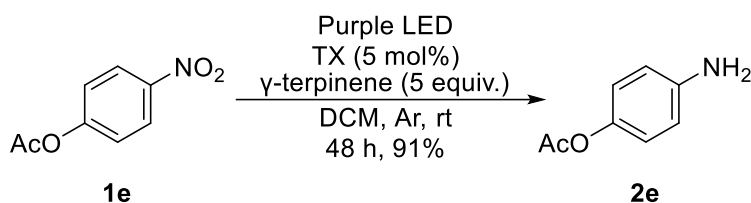

The reaction of **1e** (36.4 mg, 0.2 mmol), TX (2.0 mg, 0.01 mmol),  $\gamma$ -terpinene (160  $\mu$ L, 1.0 mmol), and anhydrous DCM (20 mL) afforded **2e**<sup>4</sup> as a white solid (27.5 mg, 91%). <sup>1</sup>H NMR (400 MHz, CDCl<sub>3</sub>)  $\delta$  6.85 (d,  $J$  = 8.8 Hz, 2 H), 6.64 (d,  $J$  = 8.8 Hz, 2 H), 3.62 (brs, 2 H), 2.25 (s, 3 H).

### 5) 4-Hydroxyaniline (**2f**)

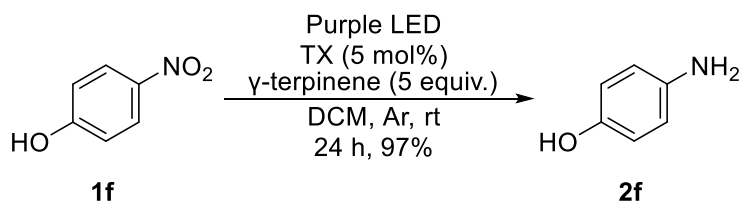

The reaction of **1f** (28.0 mg, 0.2 mmol), TX (2.2 mg, 0.01 mmol),  $\gamma$ -terpinene (160  $\mu$ L, 1.0 mmol), and anhydrous DCM (20 mL) afforded **2f**<sup>5</sup> as a solid (21.3 mg, 97%). <sup>1</sup>H NMR (400 MHz, CD<sub>3</sub>OD)  $\delta$  6.67-6.56 (m, 4 H).

### 6) 4-(((Trifluoromethyl)sulfonyl)oxy)aniline (**2g**)

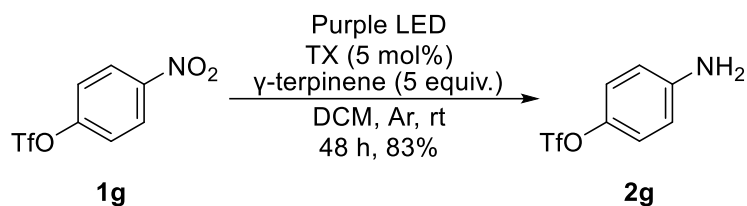

The reaction of **1g** (54.2 mg, 0.2 mmol), TX (2.1 mg, 0.01 mmol),  $\gamma$ -terpinene (160  $\mu$ L, 1.0 mmol), and anhydrous DCM (20 mL) afforded **2g**<sup>6</sup> as a white solid (40.0 mg, 83%). <sup>1</sup>H NMR (400 MHz, CDCl<sub>3</sub>)  $\delta$  7.04 (d,  $J$  = 8.8 Hz, 2 H), 6.65 (d,  $J$  = 8.8 Hz, 2 H), 3.80 (brs, 2 H).

#### 7) 4-(*N*-methylacetamido)aniline (**2h**)

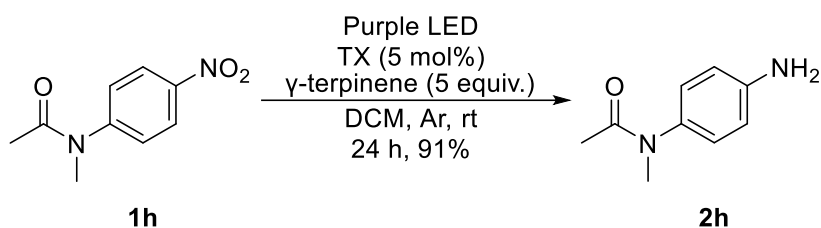

The reaction of **1h** (38.9 mg, 0.2 mmol), TX (2.2 mg, 0.01 mmol),  $\gamma$ -terpinene (160  $\mu$ L, 1.0 mmol), and anhydrous DCM (20 mL) afforded **2h**<sup>7</sup> as a solid (29.9 mg, 91%). <sup>1</sup>H NMR (400 MHz, CDCl<sub>3</sub>)  $\delta$  6.94 (d,  $J$  = 8.4 Hz, 2 H), 6.68 (d,  $J$  = 8.4 Hz, 2 H), 3.87 (brs, 2 H), 3.20 (s, 3 H), 1.85 (s, 3 H).

#### 8) *p*-Toluidine (**2i**)

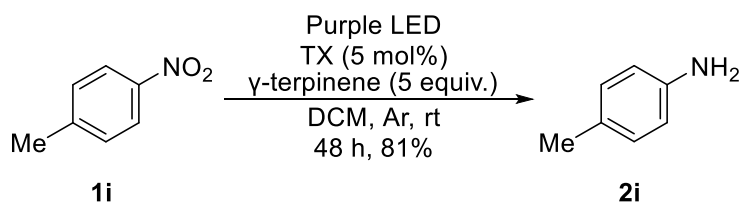

The reaction of **1i** (27.5 mg, 0.2 mmol), TX (2.1 mg, 0.01 mmol),  $\gamma$ -terpinene (160  $\mu$ L, 1.0 mmol), and anhydrous DCM (20 mL) afforded **2i**<sup>8</sup> as a solid (17.4 mg, 81%). <sup>1</sup>H NMR (400 MHz, CDCl<sub>3</sub>)  $\delta$  6.96 (d,  $J$  = 8.8 Hz, 2 H), 6.61 (d,  $J$  = 8.8 Hz, 2 H), 3.29 (brs, 2 H), 2.23 (s, 3 H).

#### 9) *m*-Toluidine (**2j**)

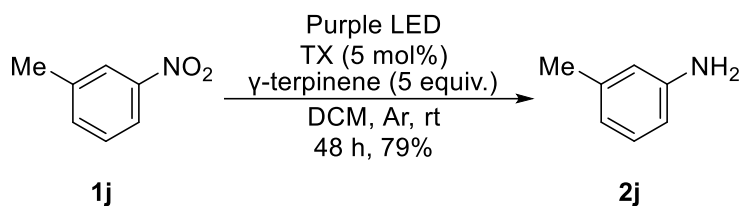

The reaction of **1j** (24  $\mu$ L, 0.2 mmol), TX (2.1 mg, 0.01 mmol),  $\gamma$ -terpinene (160  $\mu$ L, 1.0 mmol), and anhydrous DCM (20 mL) afforded **2j**<sup>3</sup> as a liquid (16.9 mg, 79%). <sup>1</sup>H NMR (400 MHz, CDCl<sub>3</sub>)  $\delta$  7.04 (dd,  $J$  = 7.6, 7.2 Hz, 1 H), 6.58 (d,  $J$  = 7.2 Hz, 1 H), 6.53-6.46 (m, 2 H), 3.36 (brs, 2 H), 2.26 (s, 3 H).

#### 10) *o*-Toluidine (**2k**)

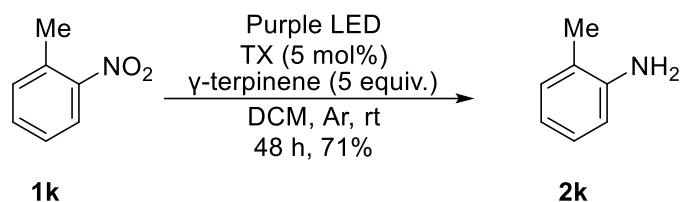

The reaction of **1k** (24  $\mu$ L, 0.2 mmol), TX (2.1 mg, 0.01 mmol),  $\gamma$ -terpinene (160  $\mu$ L, 1.0 mmol), and anhydrous DCM (20 mL) afforded **2k**<sup>3</sup> as a liquid (15.2 mg, 71%). <sup>1</sup>H NMR (400 MHz, CDCl<sub>3</sub>)  $\delta$  7.07-7.00 (m, 2 H), 6.74-6.64 (m, 2 H), 3.53 (brs, 2 H), 2.16 (s, 3 H).

#### 11) Aniline (**2l**)

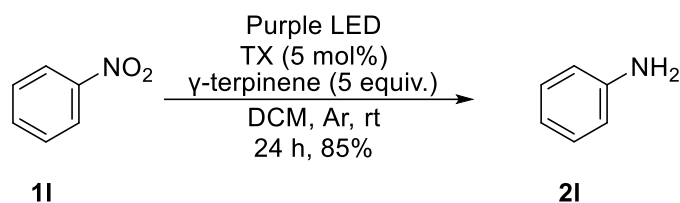

The reaction of **1l** (24.5 mg, 0.2 mmol), TX (2.1 mg, 0.01 mmol),  $\gamma$ -terpinene (160  $\mu$ L, 1.0 mmol), and anhydrous DCM (20 mL) afforded **2l**<sup>2</sup> as a liquid (15.8 mg, 85%). <sup>1</sup>H NMR (400 MHz, CDCl<sub>3</sub>)  $\delta$  7.32-7.23 (m, 2 H), 7.03-6.97 (m, 3 H), 6.20 (brs, 2 H).

#### 12) 4-Bromoaniline (**2m**)

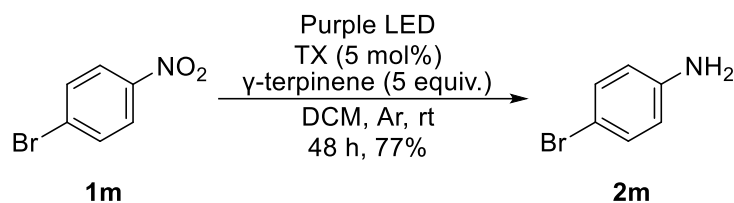

The reaction of **1m** (40.5 mg, 0.2 mmol), TX (2.1 mg, 0.01 mmol),  $\gamma$ -terpinene (160  $\mu$ L, 1.0 mmol), and anhydrous DCM (20 mL) afforded **2m**<sup>2</sup> as a liquid (26.5 mg, 77%). <sup>1</sup>H NMR (400 MHz, CDCl<sub>3</sub>)  $\delta$  7.22 (d,  $J$  = 8.8 Hz, 2 H), 6.54 (d,  $J$  = 8.8 Hz, 2 H), 3.65 (brs, 2 H).

### 13) 4-Fluoroaniline (**2n**)

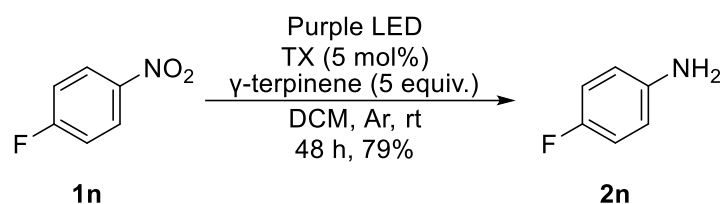

The reaction of **1n** (28.3 mg, 0.2 mmol), TX (2.1 mg, 0.01 mmol),  $\gamma$ -terpinene (160  $\mu$ L, 1.0 mmol), and anhydrous DCM (20 mL) afforded **2n**<sup>2</sup> as a liquid (17.6 mg, 79%). <sup>1</sup>H NMR (400 MHz, CDCl<sub>3</sub>)  $\delta$  6.85 (dd,  $J$  = 8.8, 8.4 Hz, 2 H), 6.61 (dd,  $J$  = 8.8, 4.4 Hz, 2 H), 3.52 (brs, 2 H).

### 14) 3-Fluoroaniline (**2o**)

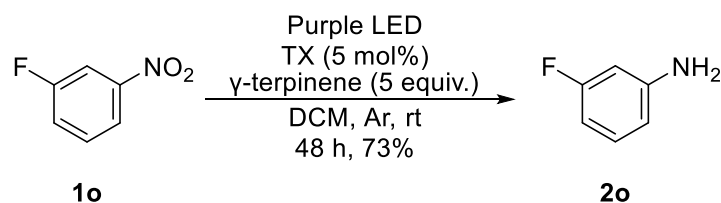

The reaction of **1o** (28.3 mg, 0.2 mmol), TX (2.1 mg, 0.01 mmol),  $\gamma$ -terpinene (160  $\mu$ L, 1.0 mmol), and anhydrous DCM (20 mL) afforded **2o**<sup>3</sup> as a liquid (16.2 mg, 73%). <sup>1</sup>H NMR (400 MHz, CDCl<sub>3</sub>)  $\delta$  7.13-7.03 (m, 1 H), 6.47-6.34 (m, 3 H), 3.71 (brs, 2 H).

### 15) 2-Fluoroaniline (**2p**)



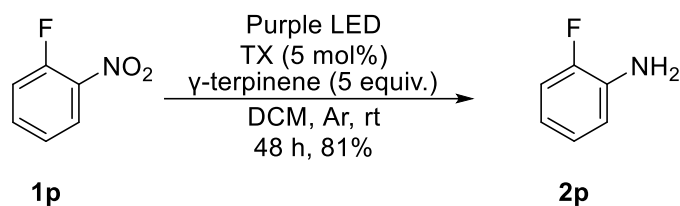

The reaction of **1p** (28.4 mg, 0.2 mmol), TX (2.1 mg, 0.01 mmol),  $\gamma$ -terpinene (160  $\mu$ L, 1.0 mmol), and anhydrous DCM (20 mL) afforded **2p**<sup>3</sup> as a liquid (18.0 mg, 81%). <sup>1</sup>H NMR (400 MHz, CDCl<sub>3</sub>)  $\delta$  7.02-6.89 (m, 2 H), 6.82-6.73 (m, 1 H), 6.72-6.64 (m, 1 H), 3.57 (brs, 2 H).

#### 16) 4-Phenylaniline (**2q**)

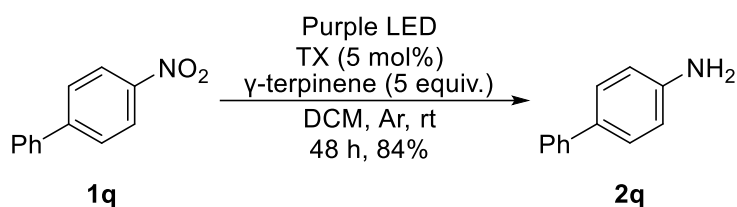

The reaction of **1q** (40.1 mg, 0.2 mmol), TX (2.1 mg, 0.01 mmol),  $\gamma$ -terpinene (160  $\mu$ L, 1.0 mmol), and anhydrous DCM (20 mL) afforded **2q**<sup>2</sup> as a white solid (28.4 mg, 84%). <sup>1</sup>H NMR (400 MHz, CDCl<sub>3</sub>)  $\delta$  7.53 (d,  $J$  = 6.8 Hz, 2 H), 7.44-7.35 (m, 4 H), 7.26 (t,  $J$  = 7.2 Hz, 1 H), 6.75 (d,  $J$  = 8.4 Hz, 2 H), 3.71 (brs, 2 H).

#### 17) 4-(Trifluoromethyl)aniline (**2r**)

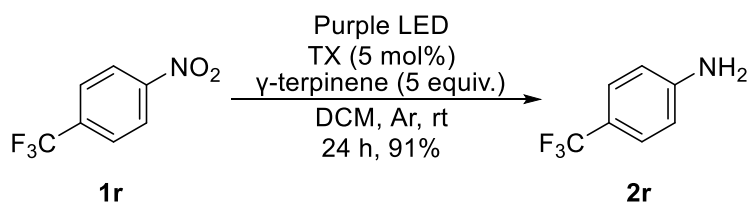

The reaction of **1r** (38.4 mg, 0.2 mmol), TX (2.2 mg, 0.01 mmol),  $\gamma$ -terpinene (160  $\mu$ L, 1.0 mmol), and anhydrous DCM (20 mL) afforded **2r**<sup>2</sup> as a white solid (29.2 mg, 91%). <sup>1</sup>H NMR (400 MHz, CDCl<sub>3</sub>)  $\delta$  7.39 (d,  $J$  = 8.0 Hz, 2 H), 6.69 (d,  $J$  = 8.0 Hz, 2 H), 3.93 (brs, 2 H).

#### 18) 3-(Trifluoromethyl)aniline (**2s**)

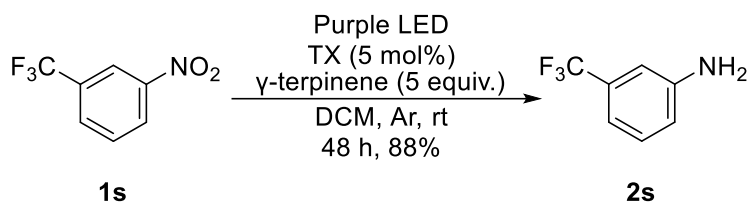

The reaction of **1s** (38.3 mg, 0.2 mmol), TX (2.1 mg, 0.01 mmol),  $\gamma$ -terpinene (160  $\mu$ L, 1.0 mmol), and anhydrous DCM (20 mL) afforded **2s**<sup>3</sup> as a liquid (28,4 mg, 88%). <sup>1</sup>H NMR (400 MHz, CDCl<sub>3</sub>)  $\delta$  7.24 (dd,  $J$  = 8.0, 7.6 Hz, 1 H), 6.99 (d,  $J$  = 7.6 Hz, 1 H), 6.89 (s, 1 H), 6.82 (d,  $J$  = 8.0 Hz, 1 H), 3.77 (brs, 2 H)..

#### 19) 2-(Trifluoromethyl)aniline (**2t**)

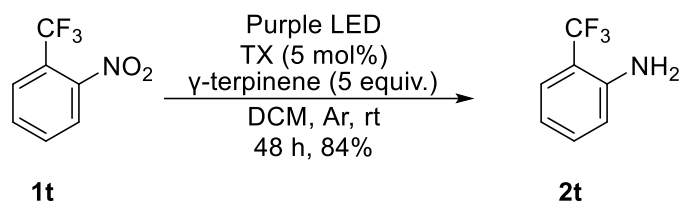

The reaction of **1t** (38.2 mg, 0.2 mmol), TX (2.1 mg, 0.01 mmol),  $\gamma$ -terpinene (160  $\mu$ L, 1.0 mmol), and anhydrous DCM (20 mL) afforded **2t**<sup>9</sup> as a a liquid (27.1 mg, 84%). <sup>1</sup>H NMR (400 MHz, CDCl<sub>3</sub>)  $\delta$  7.43 (d,  $J$  = 6.0 Hz, 1 H), 7.28 (d,  $J$  = 8.8 Hz, 1 H), 6.80-6.72 (m, 2 H), 3.82 (brs, 2 H).

#### 20) 4-Carboxyaniline (**2u**)

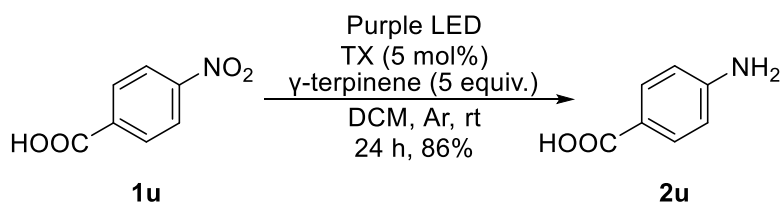

The reaction of **1u** (33.2 mg, 0.2 mmol), TX (2.1 mg, 0.01 mmol),  $\gamma$ -terpinene (160  $\mu$ L, 1.0 mmol), and anhydrous DCM (20 mL) afforded **2u**<sup>10</sup> as a solid (23.6 mg, 86%). <sup>1</sup>H NMR (400 MHz, DMSO-*d*<sub>6</sub>)  $\delta$  7.65 (d,  $J$  = 8.8 Hz, 2 H), 6.57 (d,  $J$  = 8.4 Hz, 2 H), 5.86 (brs, 2 H), 3.57 (brs, 1 H).

#### 21) 4-Cyanoaniline (**2v**)

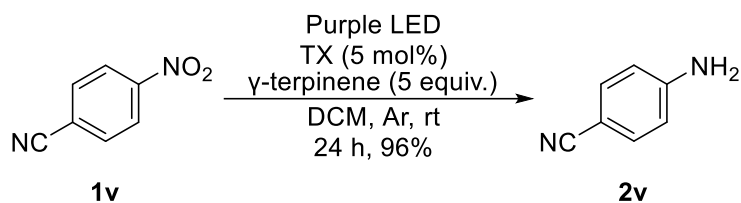

The reaction of **1v** (29.7 mg, 0.2 mmol), TX (2.1 mg, 0.01 mmol),  $\gamma$ -terpinene (160  $\mu$ L, 1.0 mmol), and anhydrous DCM (20 mL) afforded **2v**<sup>2</sup> as a solid (22.6 mg, 96%). <sup>1</sup>H NMR (400 MHz, CDCl<sub>3</sub>)  $\delta$  7.42 (d,  $J$  = 8.4 Hz, 2 H), 6.65 (d,  $J$  = 8.4 Hz, 2 H).

## 22) Pyridine-4-amine (2w)

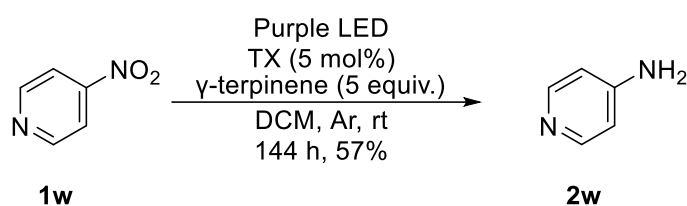

The reaction of **1w** (25.0 mg, 0.2 mmol), TX (2.1 mg, 0.01 mmol),  $\gamma$ -terpinene (160  $\mu$ L, 1.0 mmol), and anhydrous DCM (20 mL) afforded **2w**<sup>11</sup> as a solid (10.7 mg, 57%). <sup>1</sup>H NMR (400 MHz, CD<sub>3</sub>OD)  $\delta$  7.94 (d,  $J$  = 6.4 Hz, 2 H), 6.54 (d,  $J$  = 6.4 Hz, 2 H).

## 23) Quinolin-5-amine (2x)

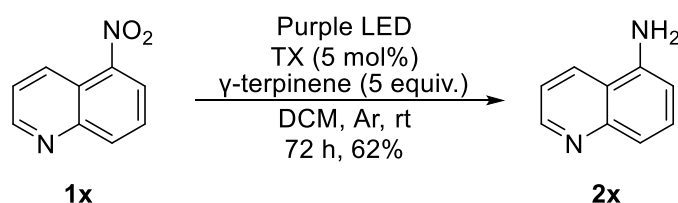

The reaction of **1x** (34.9 mg, 0.2 mmol), TX (2.0 mg, 0.01 mmol),  $\gamma$ -terpinene (160  $\mu$ L, 1.0 mmol), and anhydrous DCM (20 mL) afforded **2x**<sup>10</sup> as a solid (17.9 mg, 62%). <sup>1</sup>H NMR (400 MHz, DMSO-*d*<sub>6</sub>)  $\delta$  8.78 (dd,  $J$  = 4.0, 1.6 Hz, 1 H), 8.54 (d,  $J$  = 8.4 Hz, 1 H), 7.43 (dd,  $J$  = 8.0, 8.0 Hz, 1 H), 7.35 (dd,  $J$  = 8.4, 4.0 Hz, 1 H), 7.21 (d,  $J$  = 8.0 Hz, 1 H), 6.74 (d,  $J$  = 8.0 Hz, 1 H), 5.99 (brs, 2 H).

## 24) Isoquinolin-5-amine (2y)

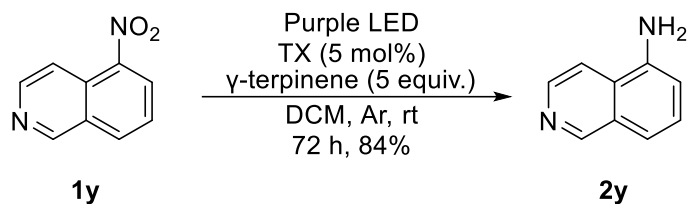

The reaction of **1y** (34.9 mg, 0.2 mmol), TX (2.2 mg, 0.01 mmol),  $\gamma$ -terpinene (160  $\mu$ L, 1.0 mmol), and anhydrous DCM (20 mL) afforded **2y**<sup>10</sup> as a solid (25.1 mg, 84%). <sup>1</sup>H NMR (400 MHz, DMSO-*d*<sub>6</sub>)  $\delta$  9.12 (s, 1 H), 8.38 (d, *J* = 6.0 Hz, 1 H), 7.97 (d, *J* = 6.0 Hz, 1 H), 7.36 (dd, *J* = 8.0, 7.6 Hz, 1 H), 7.23 (d, *J* = 8.0 Hz, 1 H), 6.90 (d, *J* = 7.6 Hz, 1 H), 5.99 (brs, 2 H).

## 25) Naphthalen-1-amine (2z)

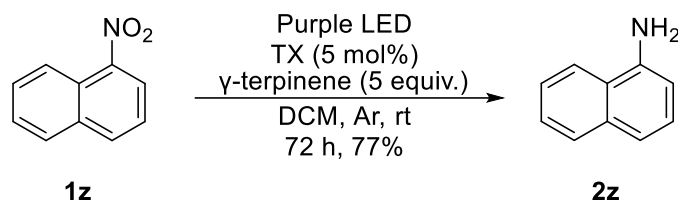

The reaction of **1z** (34.7 mg, 0.2 mmol), TX (2.1 mg, 0.01 mmol),  $\gamma$ -terpinene (160  $\mu$ L, 1.0 mmol), and anhydrous DCM (20 mL) afforded **2z**<sup>5</sup> as a solid (22.1 mg, 77%). <sup>1</sup>H NMR (400 MHz, CDCl<sub>3</sub>)  $\delta$  7.84-7.76 (m, 2 H), 7.49-7.40 (m, 2 H), 7.34-7.22 (m, 2 H), 6.77 (dd, *J* = 6.8, 1.6 Hz, 1 H), 4.12 (brs, 2 H).

## 26) Benzocaina (2aa)

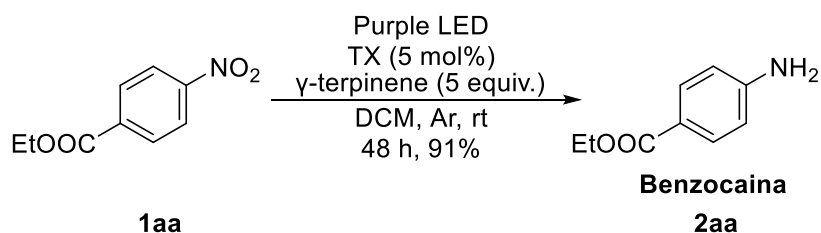

The reaction of **1aa** (39.2 mg, 0.2 mmol), TX (2.1 mg, 0.01 mmol),  $\gamma$ -terpinene (160  $\mu$ L, 1.0 mmol), and anhydrous DCM (20 mL) afforded **2aa**<sup>2</sup> as a white solid (30.1 mg, 91%). <sup>1</sup>H NMR (400 MHz, CDCl<sub>3</sub>)  $\delta$  7.85 (d, *J* = 8.4 Hz, 2 H), 6.62 (d, *J* = 8.4 Hz, 2 H), 4.31 (q, *J* = 7.2 Hz, 2 H), 4.09 (brs, 2 H), 1.35 (t, *J* = 7.2 Hz, 3 H).

## 27) Dapsone Tablet (2ab)

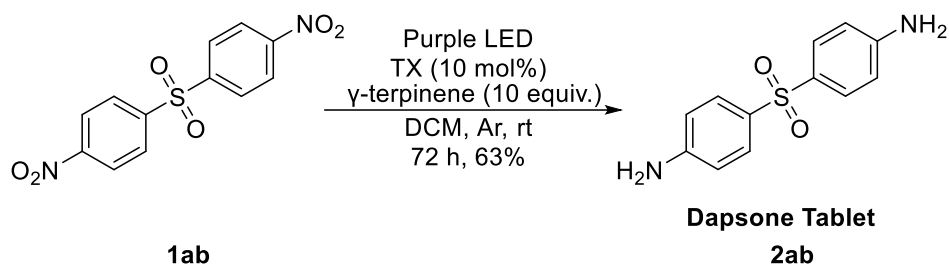

The reaction of **1ab** (61.8 mg, 0.2 mmol), TX (4.2 mg, 0.02 mmol),  $\gamma$ -terpinene (320  $\mu$ L, 2.0 mmol), and anhydrous DCM (20 mL) afforded **2ab**<sup>12</sup> as a white solid (31.2 mg, 63%). <sup>1</sup>H NMR (400 MHz, DMSO-*d*<sub>6</sub>)  $\delta$  7.53 (d, *J* = 8.8 Hz, 4 H), 6.65 (d, *J* = 8.8 Hz, 4 H), 5.99 (brs, 4 H).

## 28) 4-Carboxy-3-hydroxyaniline (**2ac**)

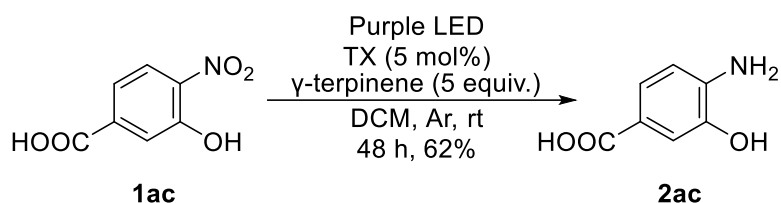

The reaction of **1ac** (36.4 mg, 0.2 mmol), TX (2.1 mg, 0.01 mmol),  $\gamma$ -terpinene (160  $\mu$ L, 1.0 mmol), and anhydrous DCM (20 mL) afforded **2ac**<sup>13</sup> as a solid (19.0 mg, 62%). <sup>1</sup>H NMR (400 MHz, DMSO-*d*<sub>6</sub>)  $\delta$  11.76 (brs, 1 H), 9.35 (brs, 1 H), 7.25-7.19 (m, 2 H), 6.57 (d, *J* = 8.0 Hz, 1 H), 5.27 (brs, 2 H).

## Gram-scale reaction of 1aa

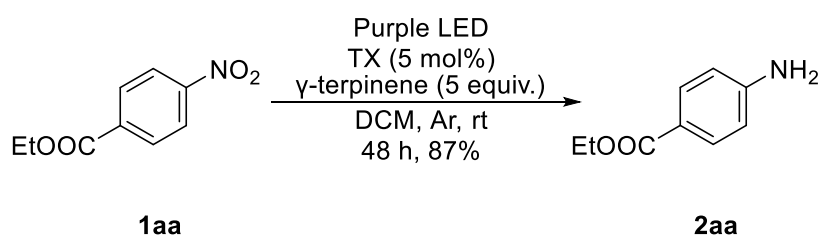

To a flame dried 500 mL of Pyrex sealed flask were added TX (64.1 mg, 0.3 mmol), **1aa** (1.173 g, 6 mmol), anhydrous DCM (500 mL), and  $\gamma$ -terpinene (4.8 mL, 30 mmol). The reaction mixture was irradiated by purple LED strip ( $\lambda$  = 415 nm, height: 10 cm, diameter: 15 cm, 30 W) at a distance of 3-5 cm under argon atmosphere at rt (maintained with three cooling fans). The reaction was completed after 48 h as monitored by TLC (eluent: petroleum ether/DCM = 1:1). The solvent was removed,

and the residue was purified by flash chromatography on silica gel (eluent: DCM) to afford **2aa**<sup>2</sup> as a solid (0.862 g, 87%).

## **Mechanism studies**

### **Time-course study**

A solution of **1a** (18.1 mg, 0.1 mmol), TX (1.1 mg, 0.005 mmol), and  $\gamma$ -terpinene (80  $\mu$ L, 0.5 mmol) in anhydrous DCM (10 mL) was irradiated by purple LED strip ( $\lambda$  = 415 nm, height: 10 cm, diameter: 15 cm, 30 W) at a distance of 3-5 cm at rt (maintained with three cooling fans) under argon atmosphere. The conversion of **1a** was determined by <sup>1</sup>H NMR analysis (400 MHz) of the crude reaction mixture using 1,3,5-trimethoxybenzene (0.01 mmol) as the internal standard (Figure S3).

**Figure S3. Time-course study**

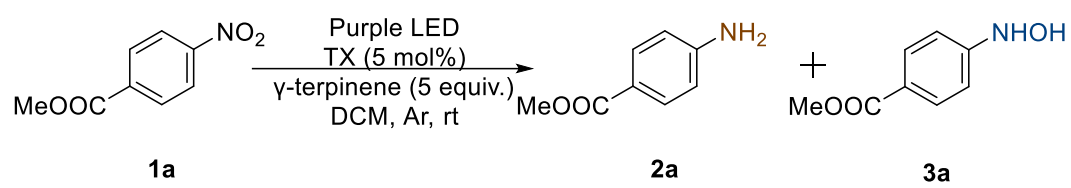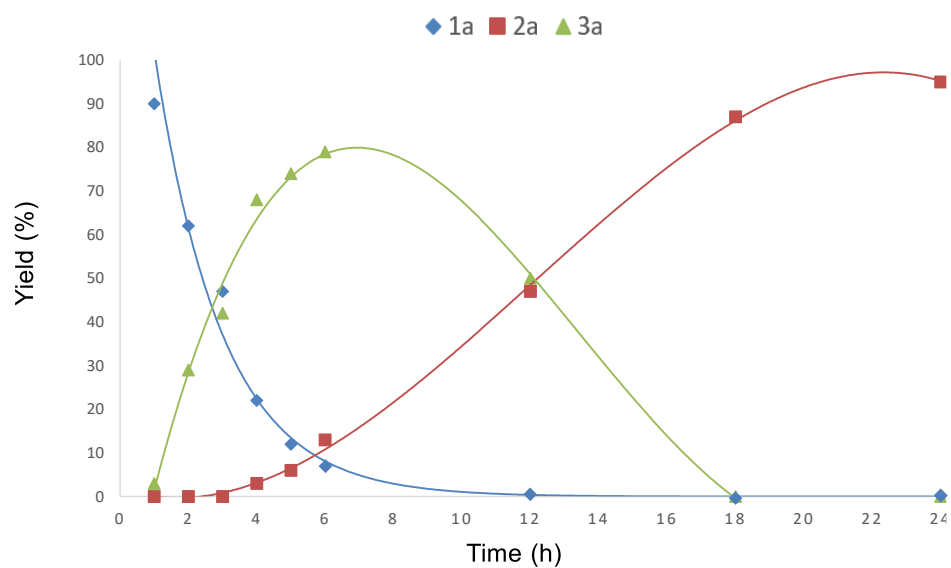

### 3a as the reactant:

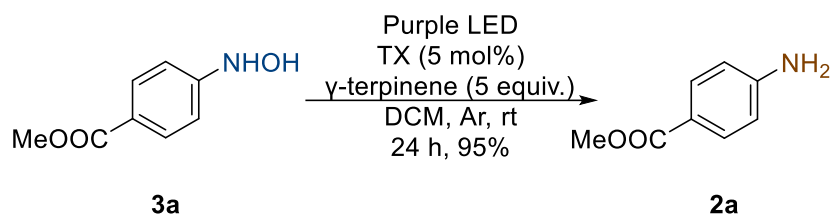

To a flame dried 10 mL of Pyrex sealed tube were added TX (1.1 mg, 0.005 mmol), **3a** (16.7 mg, 0.1 mmol), anhydrous DCM (10 mL), and  $\gamma$ -terpinene (80  $\mu$ L, 0.5 mmol). The reaction mixture was irradiated by purple LED strip ( $\lambda = 415$  nm, height: 10 cm, diameter: 15 cm, 30 W) at a distance of 3-5 cm under argon atmosphere at rt (maintained with three cooling fans). The reaction was completed after 24 h, and the yield of **2a** was determined by  $^1\text{H}$  NMR analysis (400 MHz) of the crude reaction mixture using 1,3,5-trimethoxybenzene (0.01 mmol) as the internal standard.

### Fluorescence quenching studies and Stern-Volmer analysis

Fluorescence emission quenching experiments were measured on a Hitachi F-7000 fluorescence spectrometer with a 4 mL quartz cuvette with a cap. TX was irradiated at 370 nm and the emission spectrum was recorded from 380 nm to 450 nm. In a typical experiment, the emission spectrum of a  $1.0 \times 10^{-4}$  M solution of TX in DCM was collected. Then, different amounts of  $\gamma$ -terpinene were added to a solution of TX ( $10^{-4}$  M) in DCM (Figure S4).

**Figure S4.** Fluorescence quenching spectra and Stern-Volmer plot

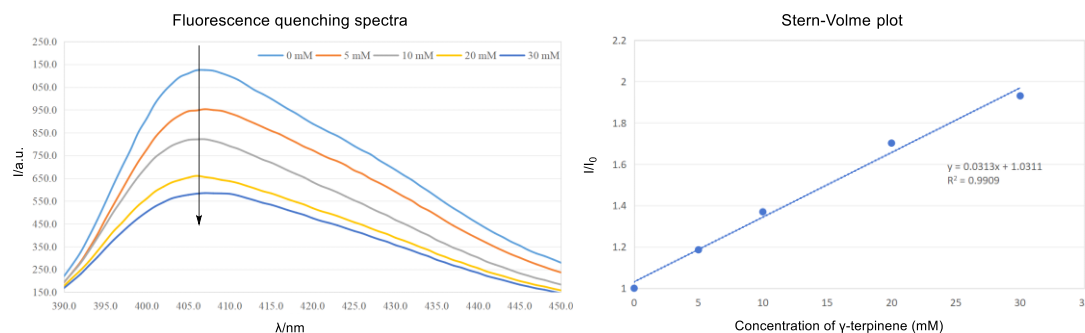



### Studies of key intermediate:

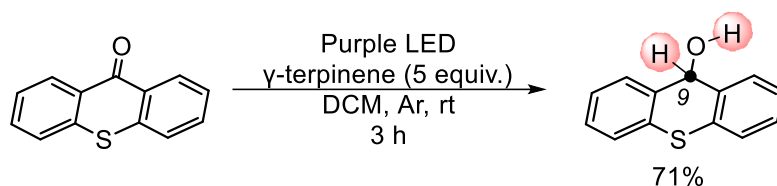

To a flame dried 25 mL of Pyrex sealed tube were added TX (212.9 mg, 1 mmol), anhydrous DCM (20 mL), and  $\gamma$ -terpinene (800  $\mu$ L, 5 mmol). The reaction mixture was irradiated by purple LED strip ( $\lambda = 415$  nm, height: 10 cm, diameter: 15 cm, 30 W) at a distance of 3-5 cm under argon atmosphere at rt (maintained with three cooling fans). The reaction was completed after 3 h. The mixture was concentrated in vacuo. The residue was dissolved in MeOH (50mL), and then washed with *n*-hexane (20 mL x 3). The MeOH layer was concentrated under reduced pressure to afford the crude 9H-thioxanthene-9-ol<sup>14</sup> as a solid (154.8 mg, 71%). <sup>1</sup>H NMR (400 MHz, CDCl<sub>3</sub>)  $\delta$  7.53 (d,  $J = 7.2$  Hz, 2 H), 7.41 (d,  $J = 7.2$  Hz, 2 H), 7.27-7.16 (m, 4 H), 5.40 (s, 1 H).

### Deuterium labeling experiment

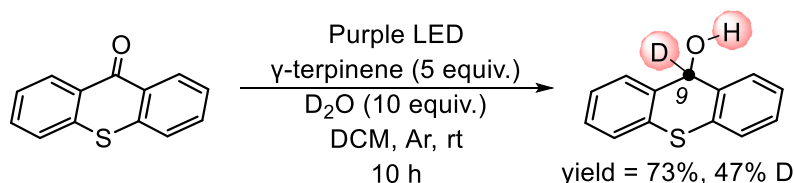

To a flame dried 25 mL of Pyrex sealed tube were added TX (212.7 mg, 1 mmol), anhydrous DCM (20 mL), D<sub>2</sub>O (180  $\mu$ L, 10 mmol), and  $\gamma$ -terpinene (800  $\mu$ L, 5 mmol). The reaction mixture was irradiated by purple LED strip ( $\lambda = 415$  nm, height: 10 cm, diameter: 15 cm, 30 W) at a distance of 3-5 cm under argon atmosphere at rt (maintained with three cooling fans). The reaction was completed after 10 h. The mixture was concentrated in vacuo. The residue was dissolved in MeOH (50 mL), and then washed with *n*-hexane (20 mL x 3). The MeOH layer was concentrated under reduced pressure to afford the crude 9H-thioxanthene-9-ol<sup>14</sup> as a solid (156.2 mg, 73%) with 47% deuterium incorporation on the 9-site of 9H-Thioxanthene-9-ol (Deuterium

ratio was determined by  $^1\text{H}$  NMR analysis).  $^1\text{H}$  NMR (400 MHz,  $\text{CDCl}_3$ )  $\delta$  7.60 (d,  $J$  = 7.6 Hz, 2 H), 7.47 (d,  $J$  = 7.6 Hz, 2 H), 7.334-7.20 (m, 4 H), 5.52 (s, 0.53 H).

#### 9*H*-thioxanthen-9-ol as reductant

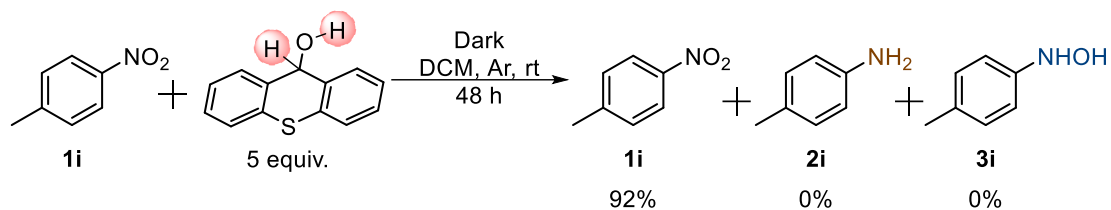

To a flame dried 10 mL of Pyrex sealed tube were added **1i** (13.7 mg, 0.1 mmol), 9*H*-thioxanthen-9-ol (107.3 mg, 0.5 mmol), and anhydrous  $\text{DCM}$  (10 mL). The reaction mixture was stirred under argon atmosphere at rt. The reaction was completed after 48 h. The yield of **2i** and **3i** and recovery of **1i** was determined by  $^1\text{H}$  NMR analysis (400 MHz) of the crude reaction mixture using 1,3,5-trimethoxybenzene (0.01 mmol) as the internal standard.

## NMR spectra

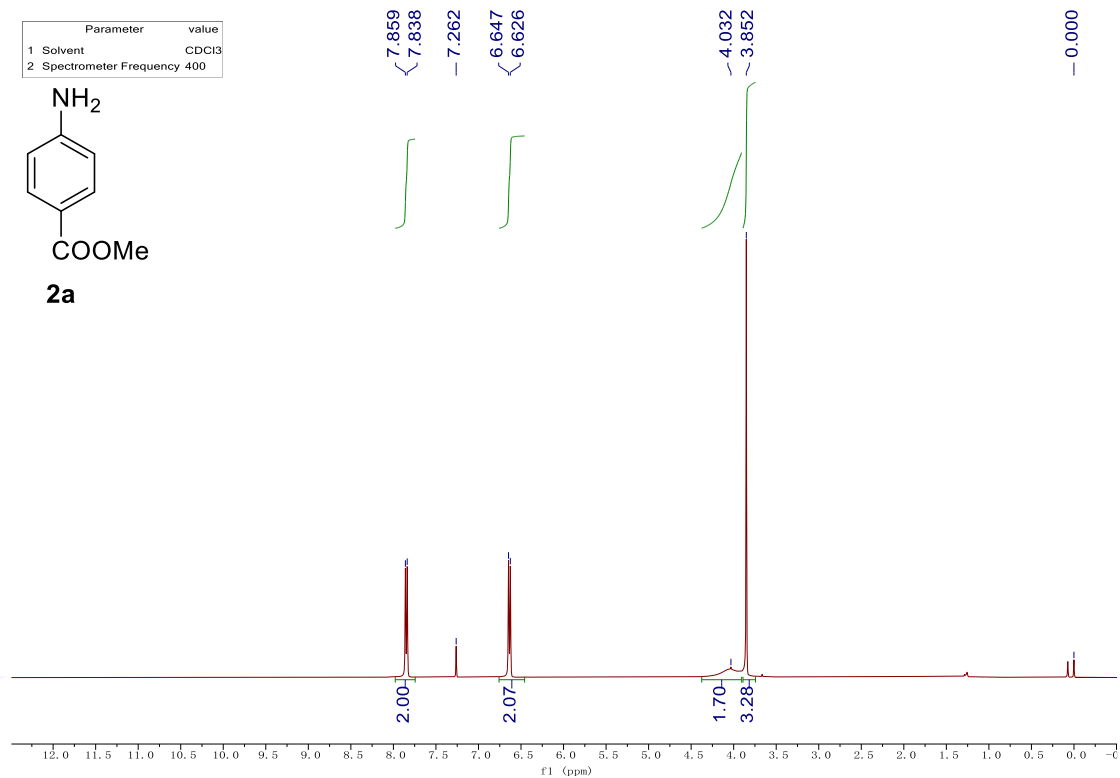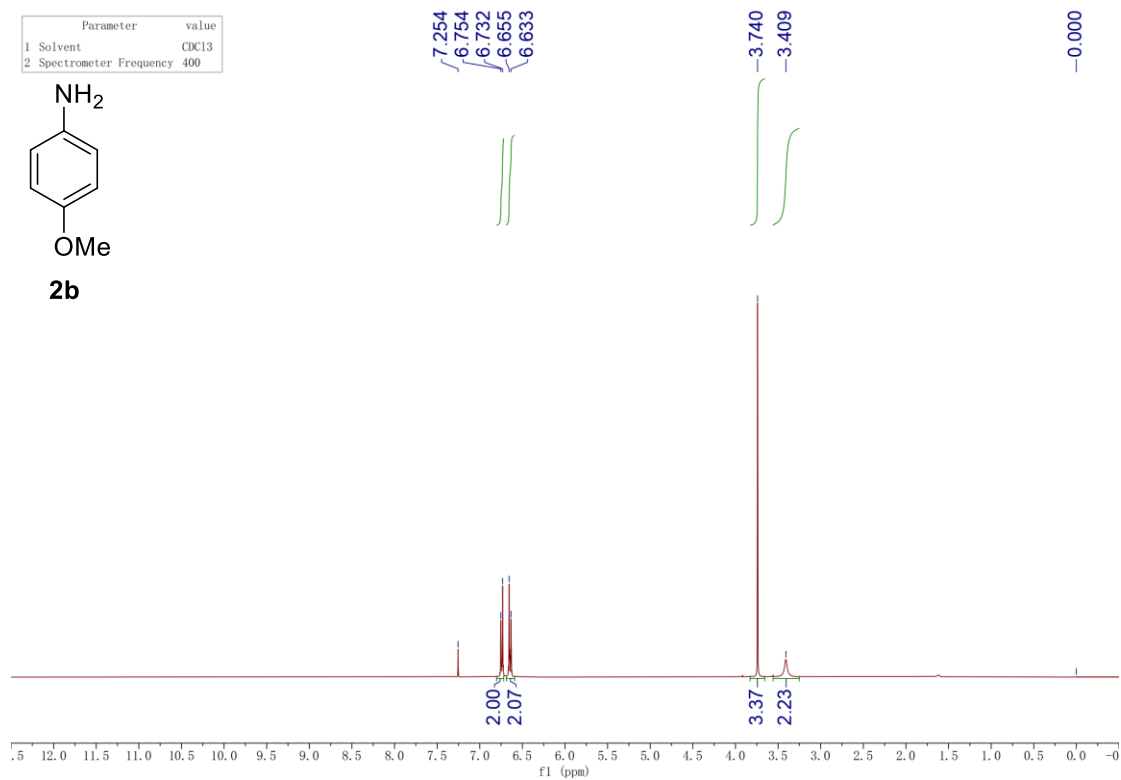

| Parameter               | value             |
|-------------------------|-------------------|
| 1Solvent                | CDCl <sub>3</sub> |
| 2Spectrometer Frequency | 400               |

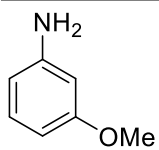

**2c**

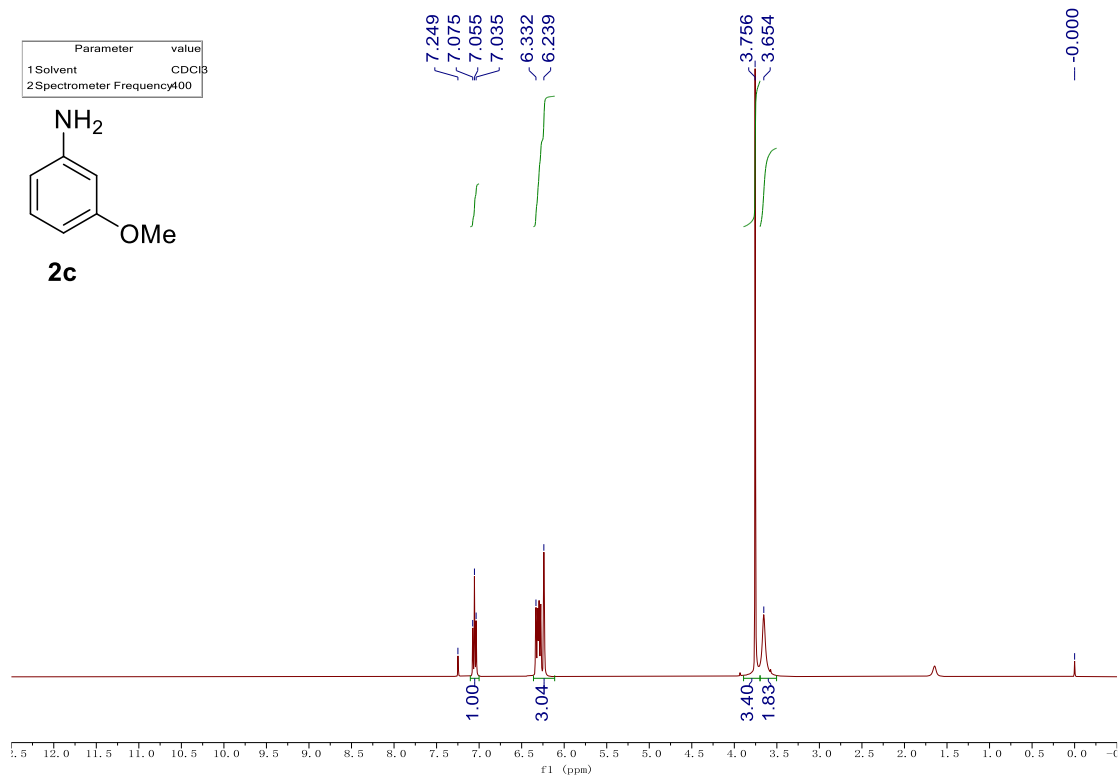

| Parameter               | value             |
|-------------------------|-------------------|
| 1Solvent                | CDCl <sub>3</sub> |
| 2Spectrometer Frequency | 400               |

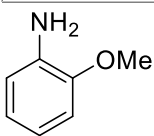

**2d**

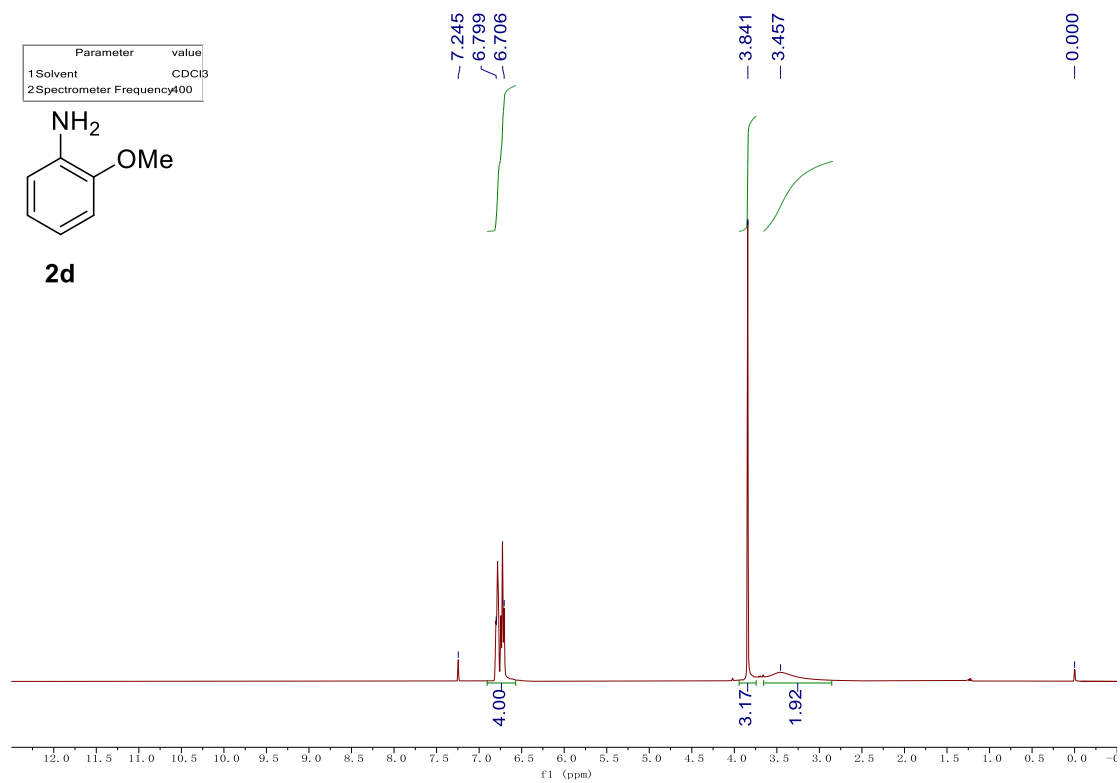

| Parameter                | value |
|--------------------------|-------|
| 1 Solvent                | CDCl3 |
| 2 Spectrometer Frequency | 400   |

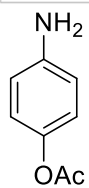

**2e**

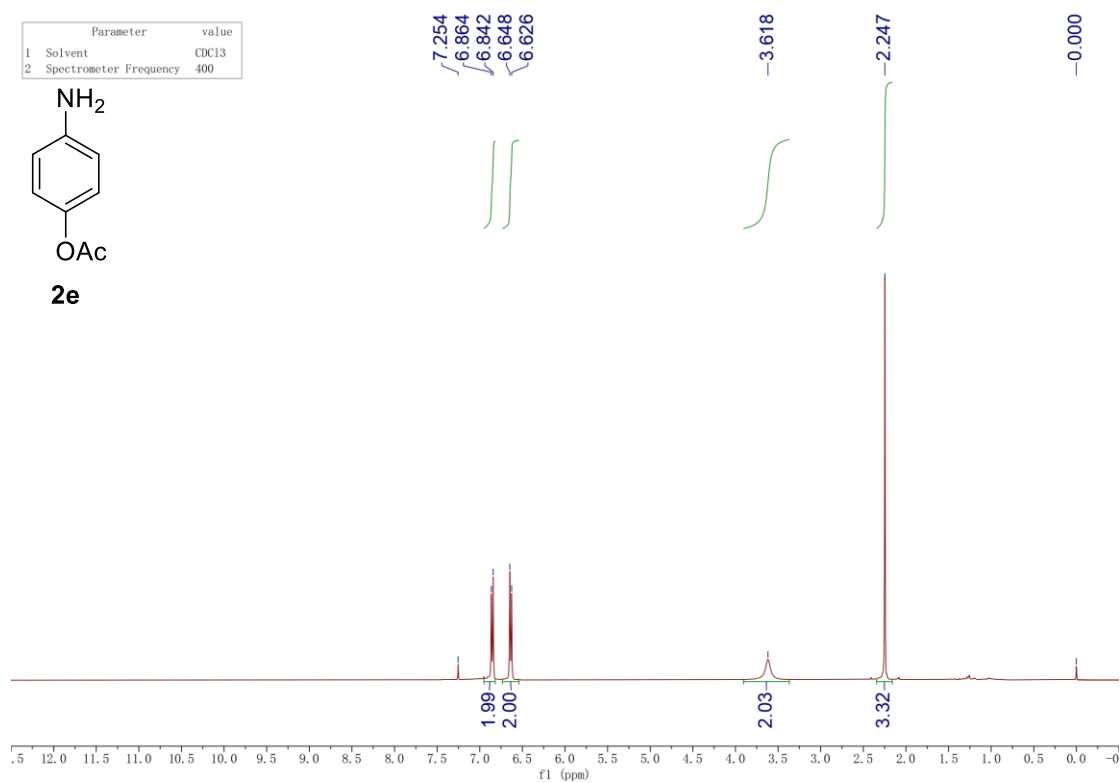

| Parameter                | value |
|--------------------------|-------|
| 1 Solvent                | CD3OD |
| 2 Spectrometer Frequency | 400   |

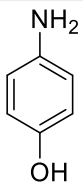

**2f**

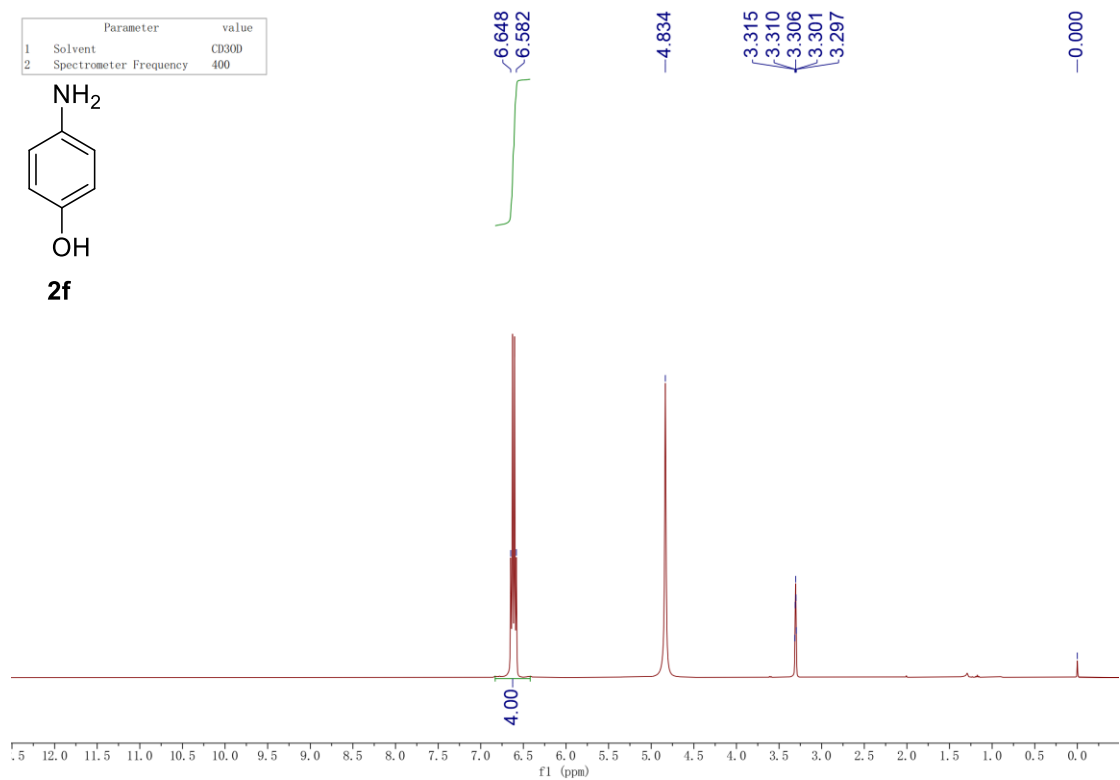

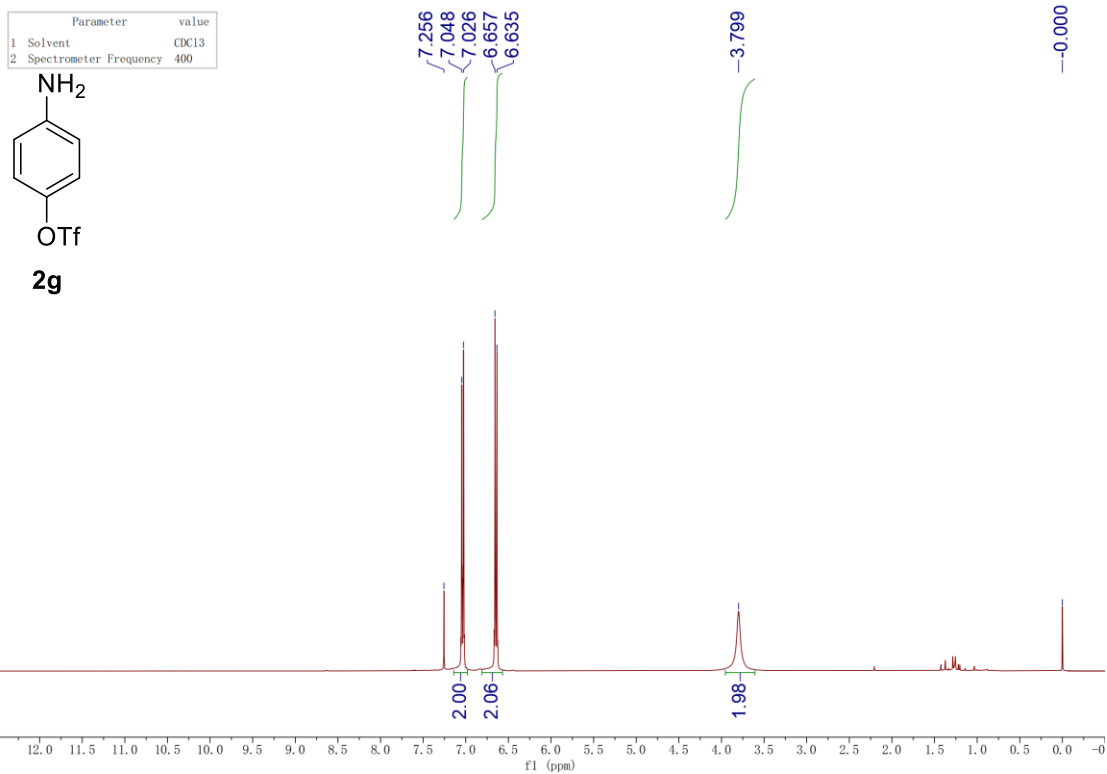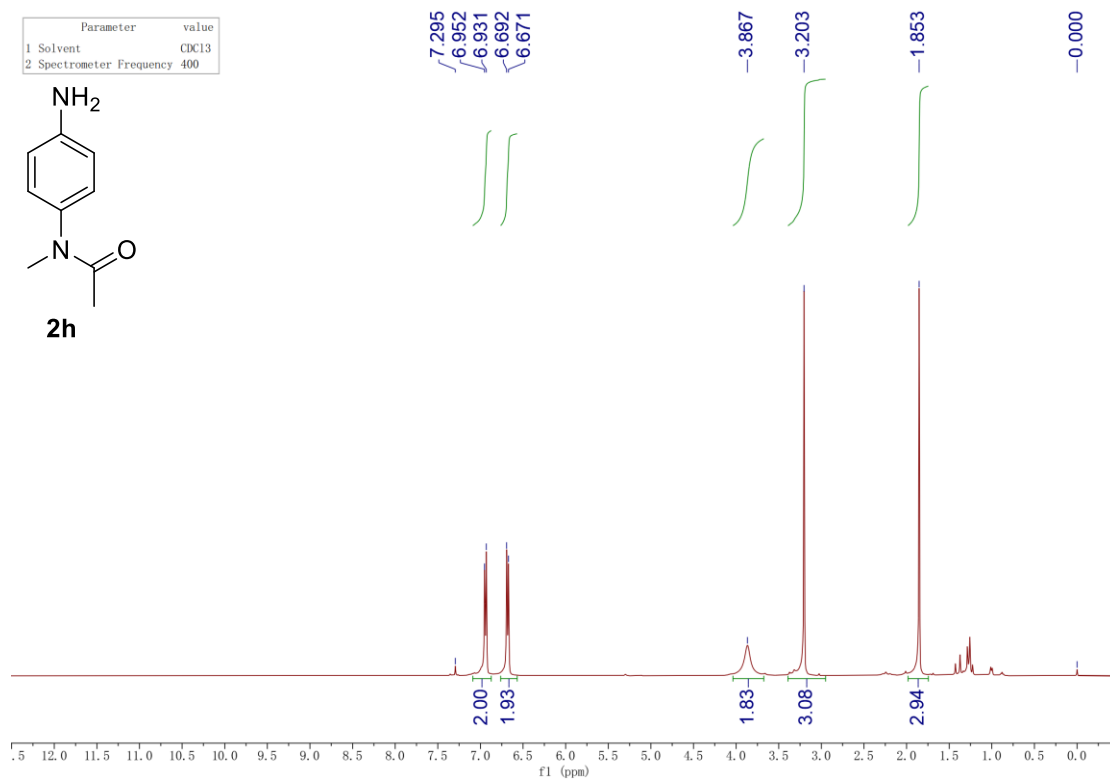

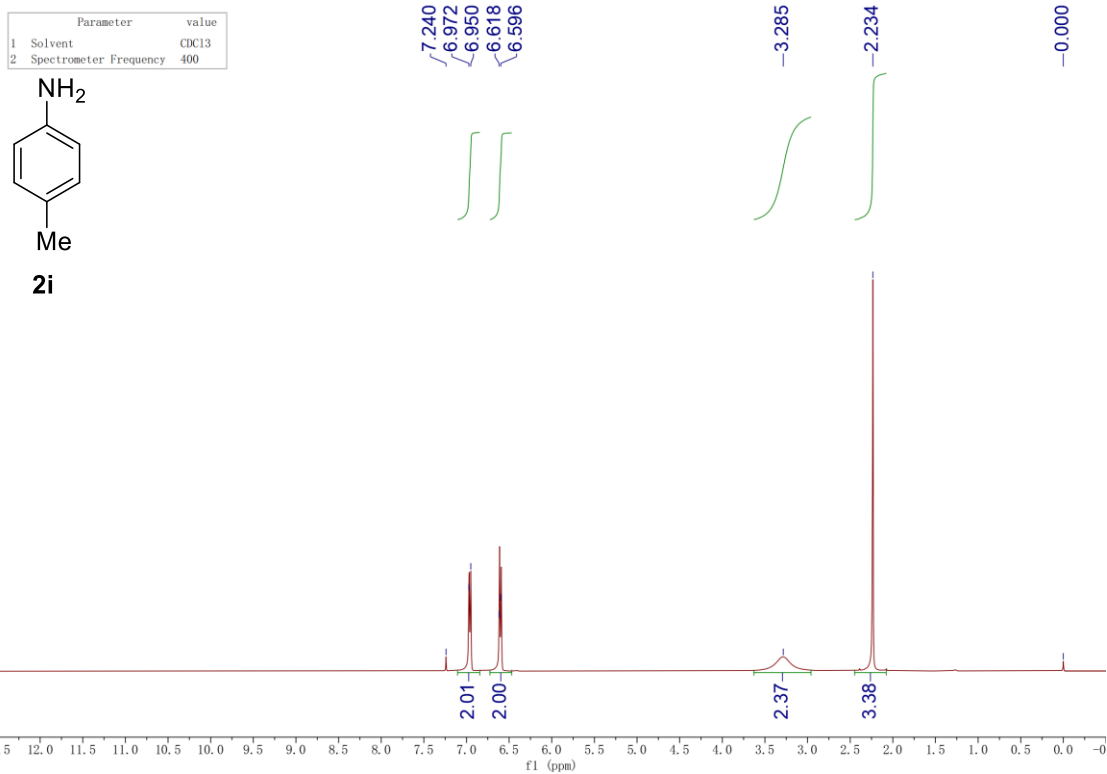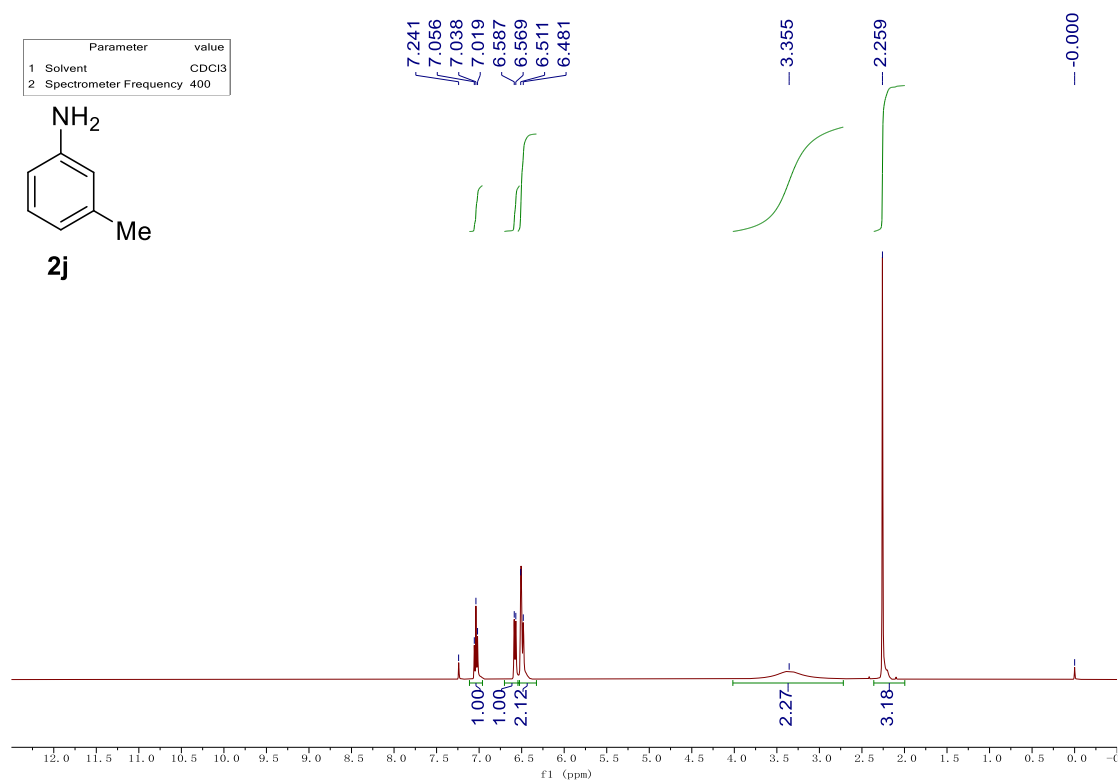

| Parameter                | value |
|--------------------------|-------|
| 1 Solvent                | CDCl3 |
| 2 Spectrometer Frequency | 400   |

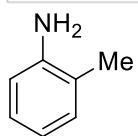

**2k**

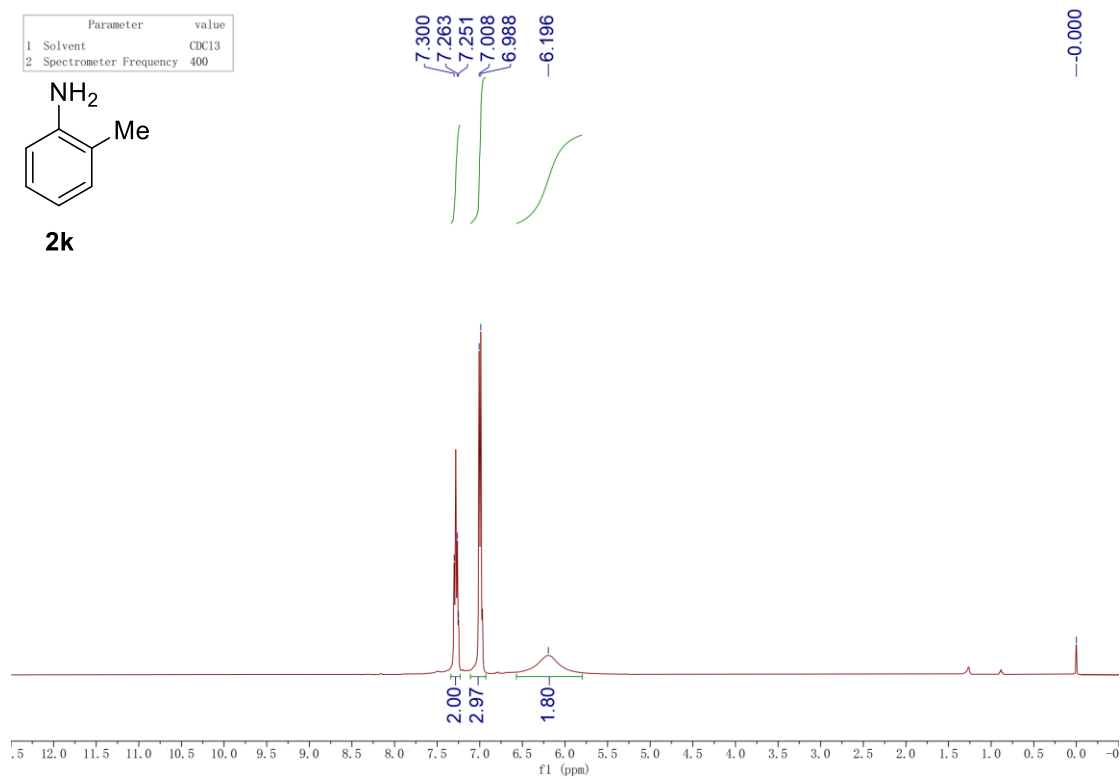

| Parameter                | value |
|--------------------------|-------|
| 1 Solvent                | CDCl3 |
| 2 Spectrometer Frequency | 400   |

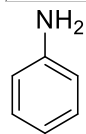

**2l**

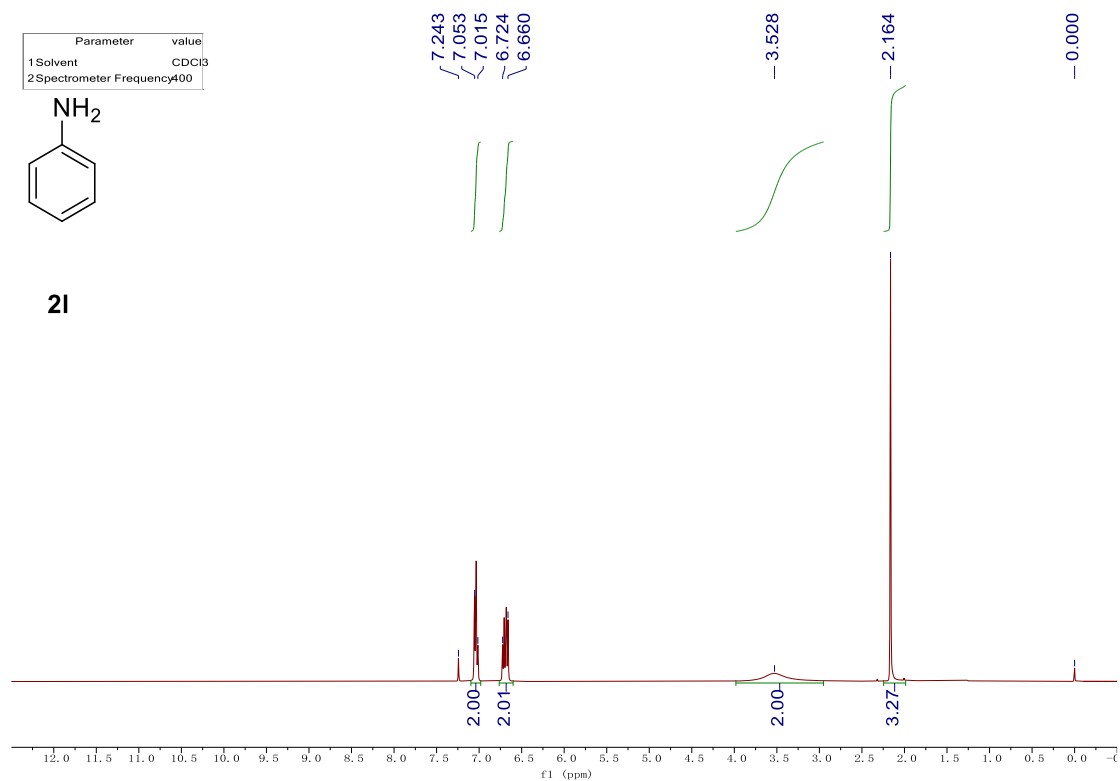



| Parameter                | value             |
|--------------------------|-------------------|
| 1 Solvent                | CDCl <sub>3</sub> |
| 2 Spectrometer Frequency | 400               |

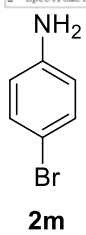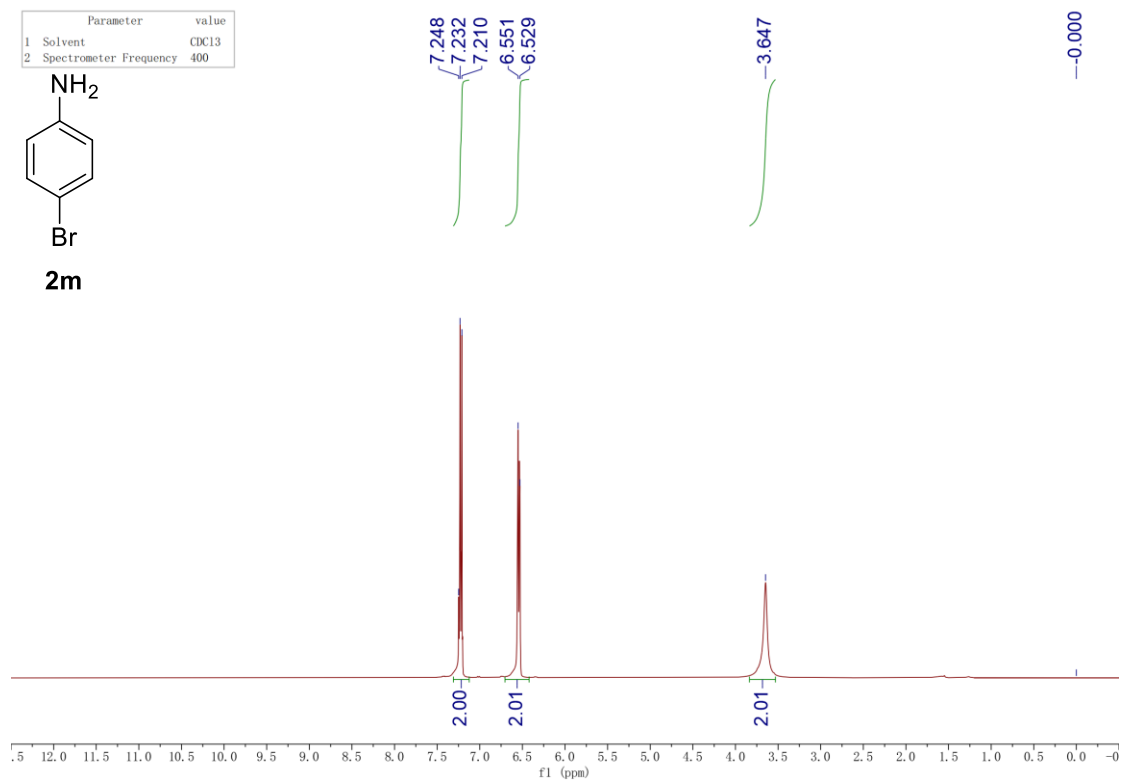

| Parameter                | value             |
|--------------------------|-------------------|
| 1 Solvent                | CDCl <sub>3</sub> |
| 2 Spectrometer Frequency | 400               |

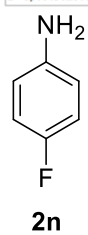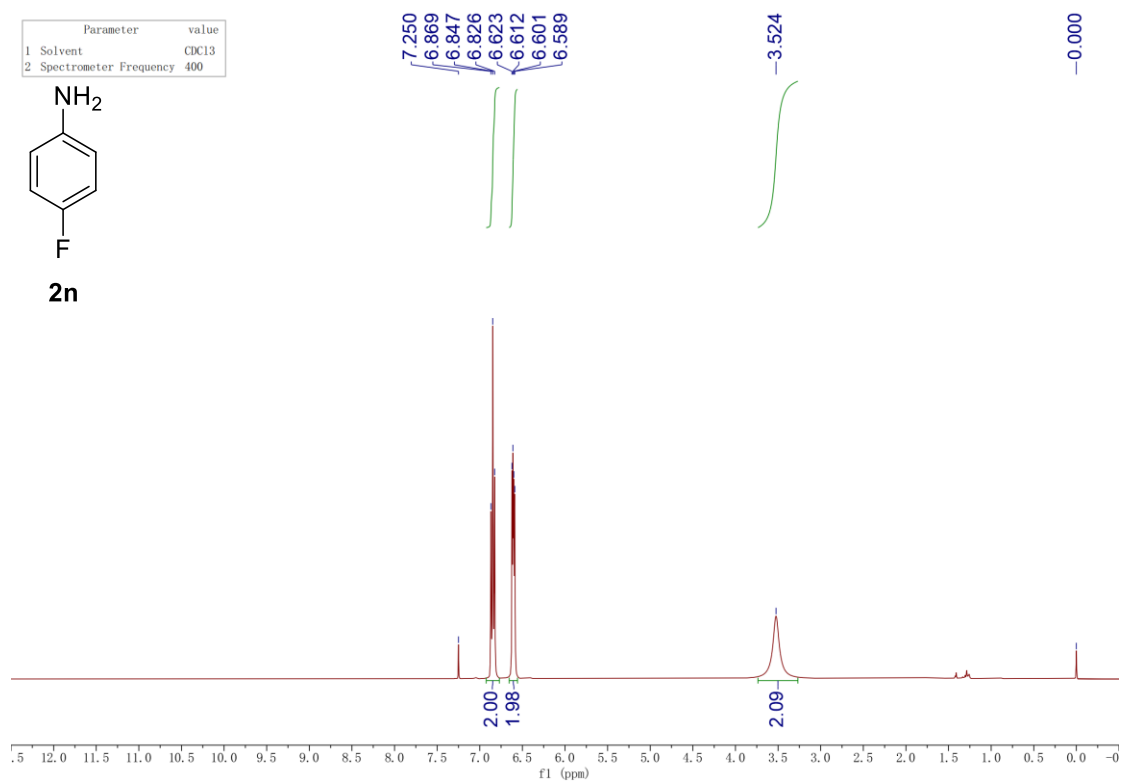

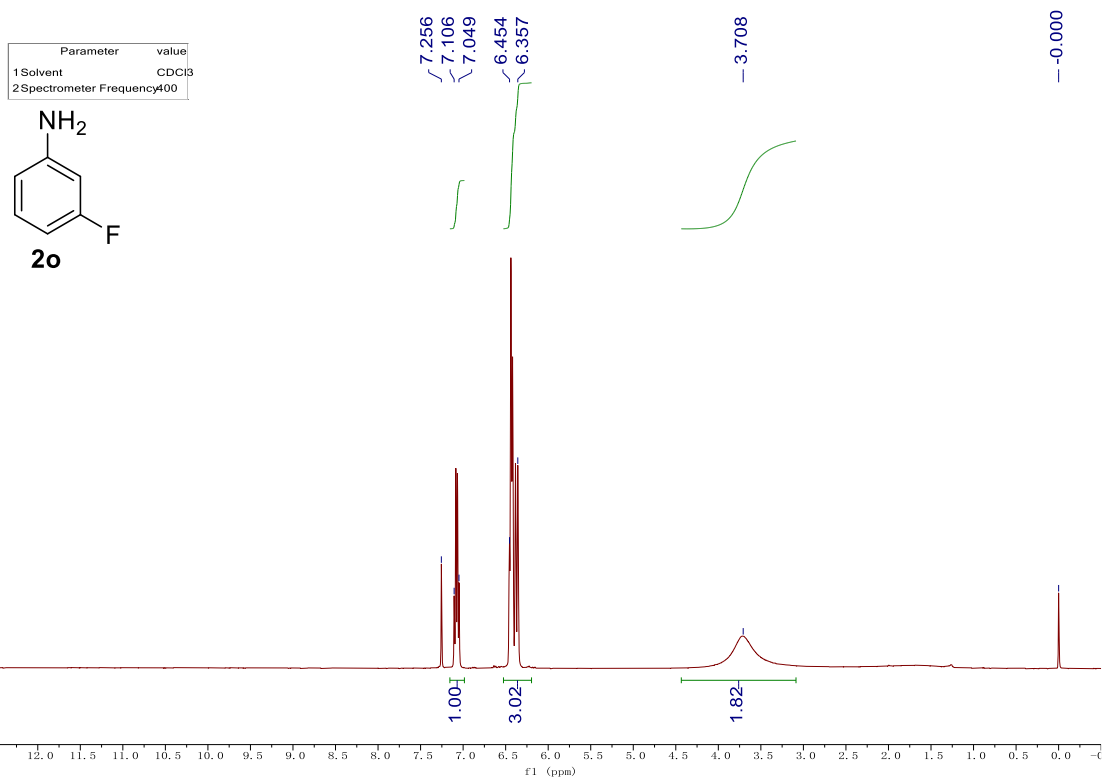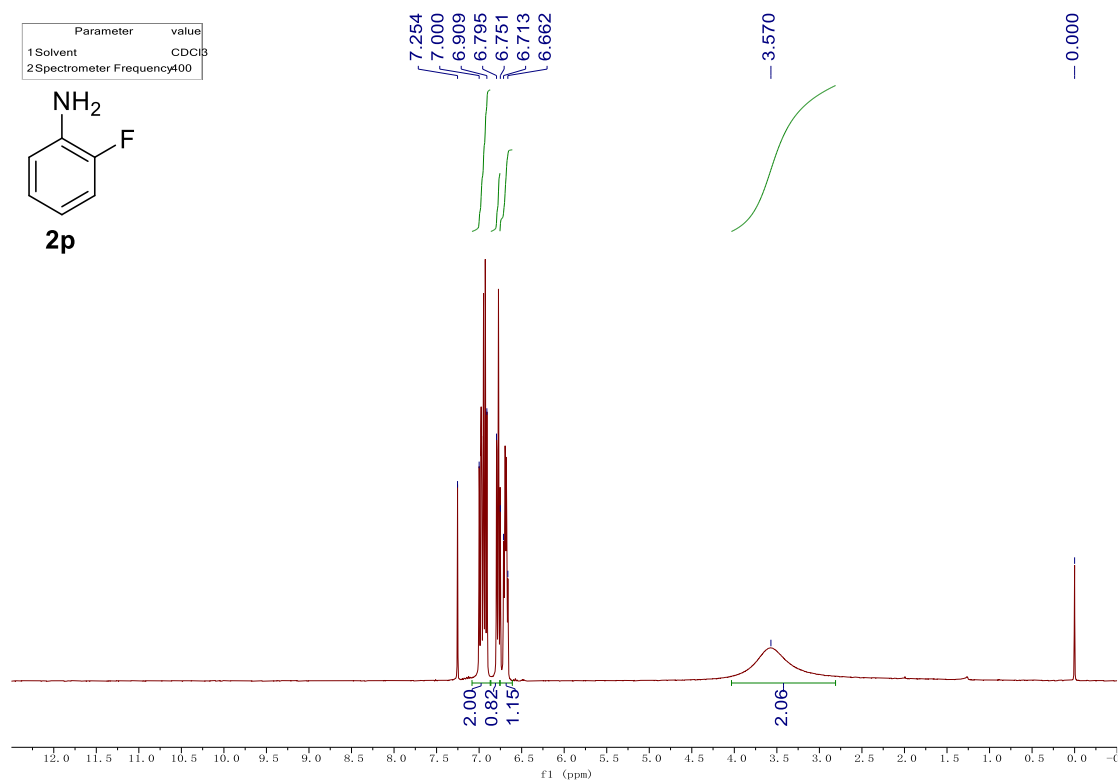

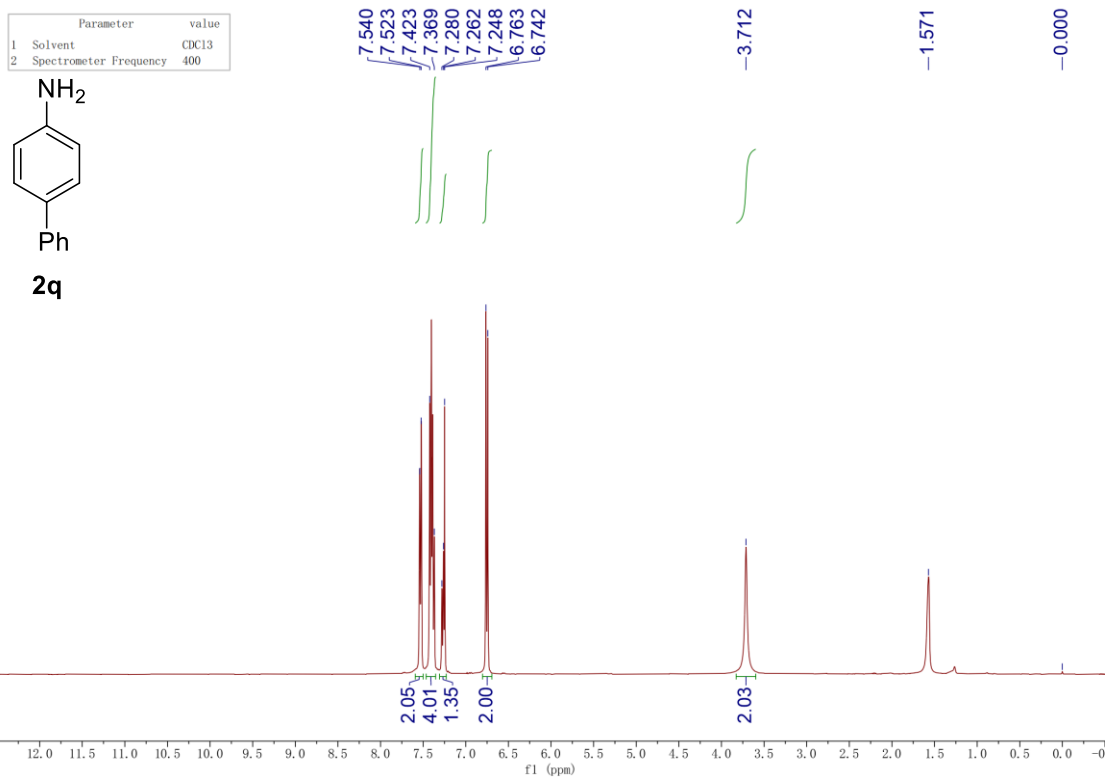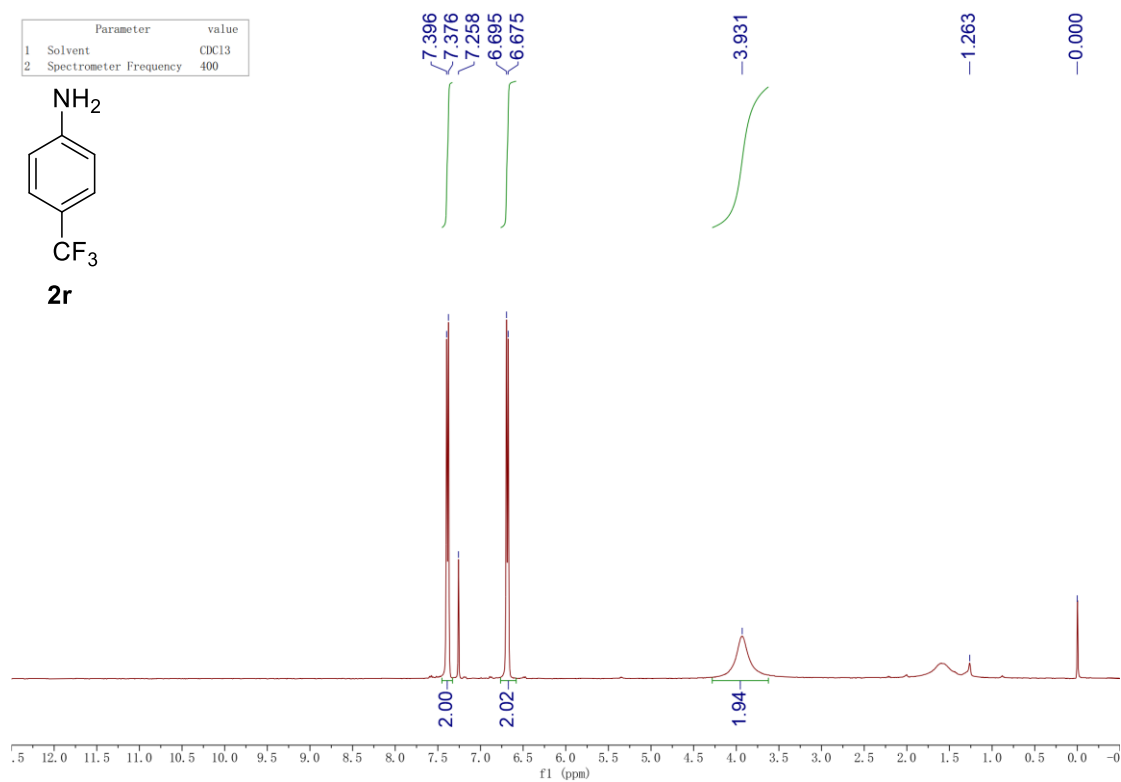

| Parameter               | value             |
|-------------------------|-------------------|
| 1Solvent                | CDCl <sub>3</sub> |
| 2Spectrometer Frequency | 400               |

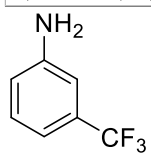

**2s**

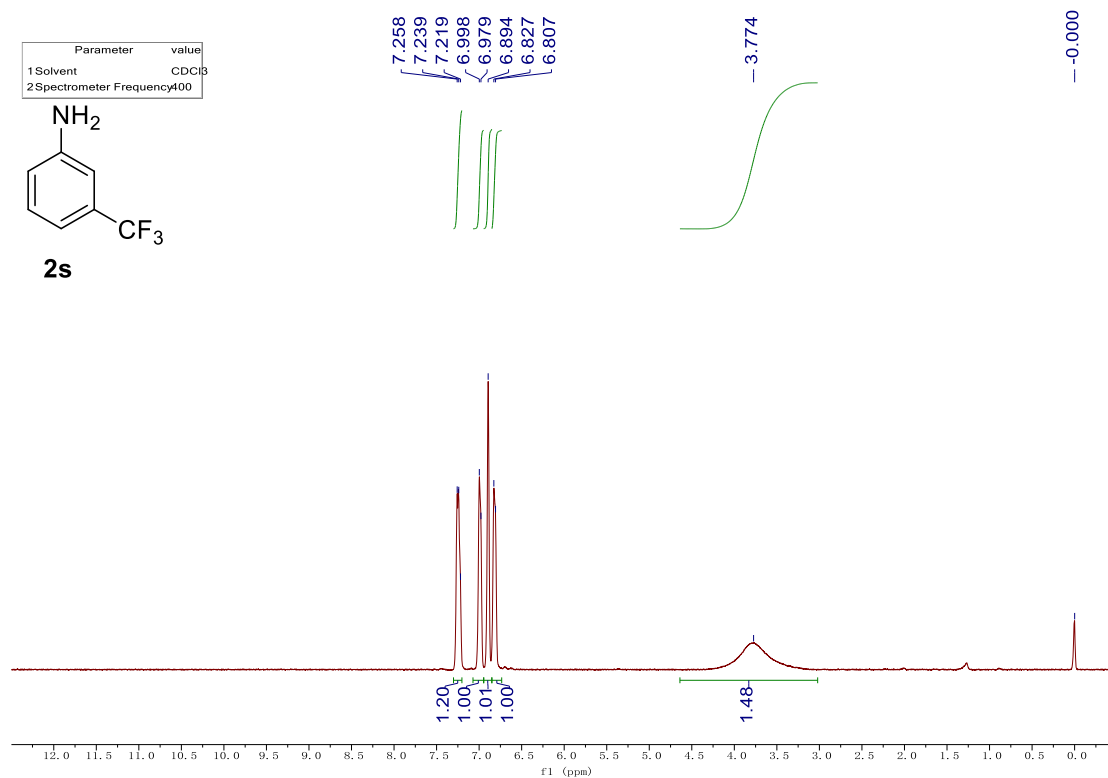

| Parameter               | value             |
|-------------------------|-------------------|
| 1Solvent                | CDCl <sub>3</sub> |
| 2Spectrometer Frequency | 400               |

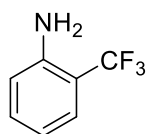

**2t**

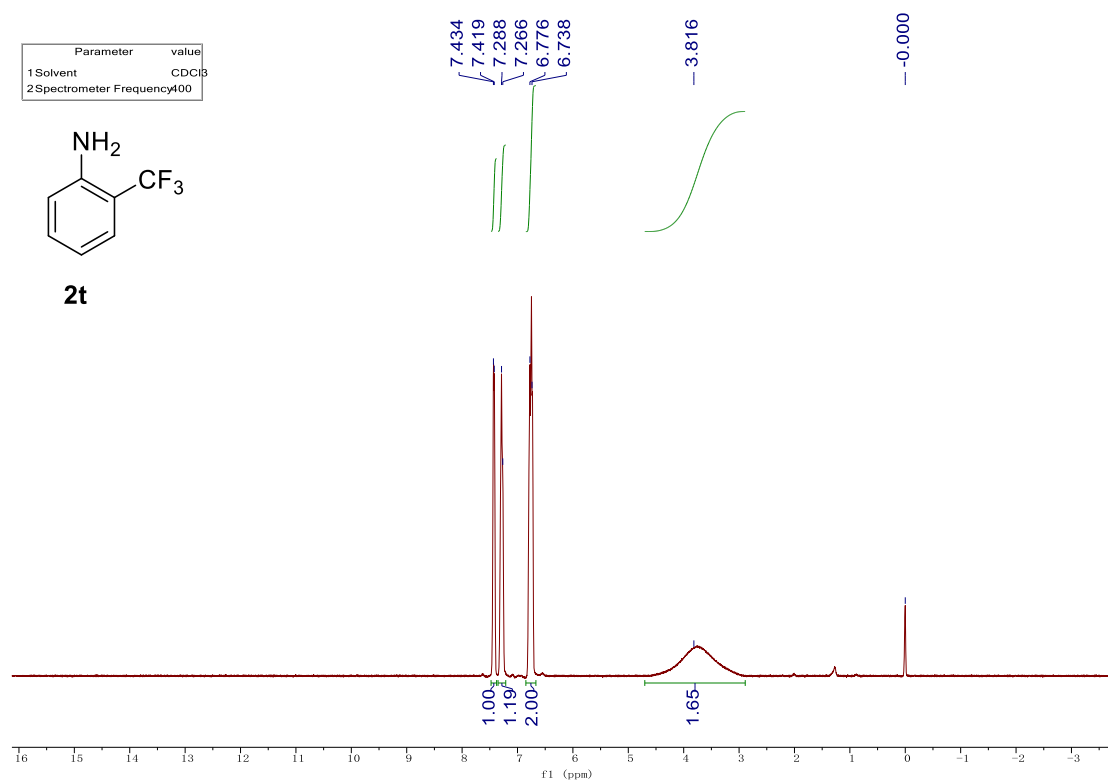

| Parameter                | value   |
|--------------------------|---------|
| 1 Solvent                | DMSO-d6 |
| 2 Spectrometer Frequency | 400     |

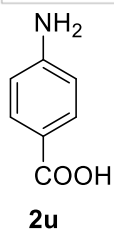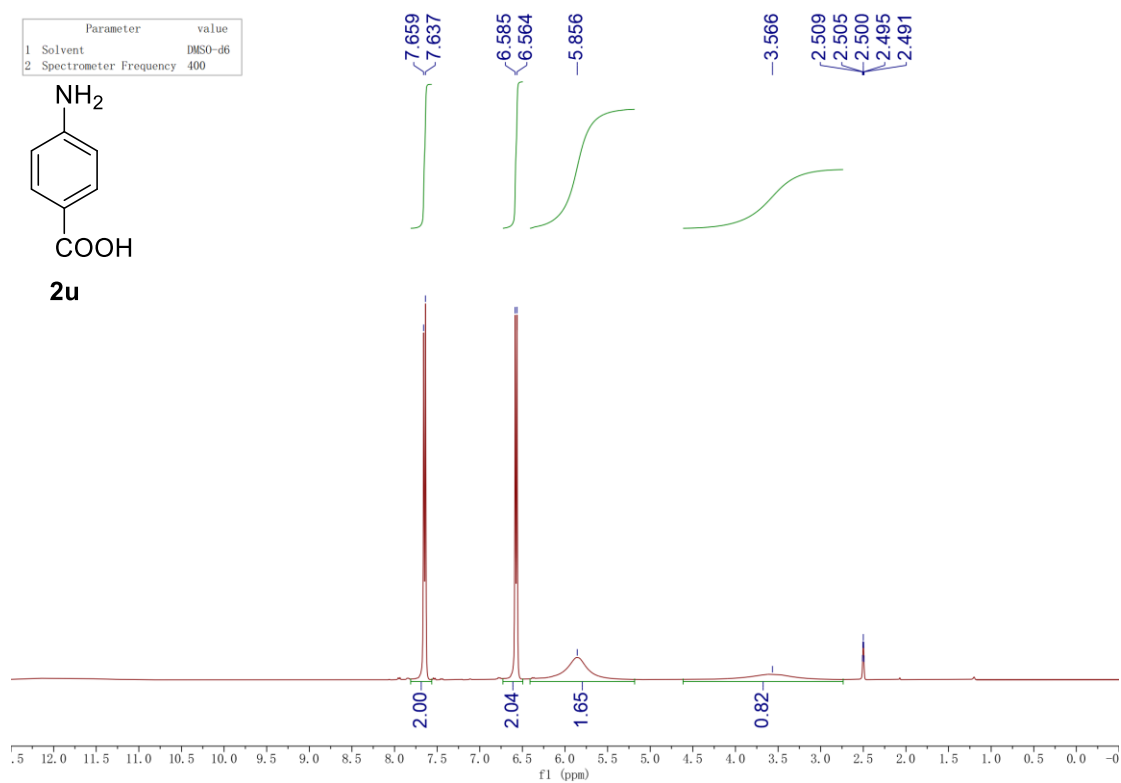

| Parameter                | value |
|--------------------------|-------|
| 1 Solvent                | CDCl3 |
| 2 Spectrometer Frequency | 400   |

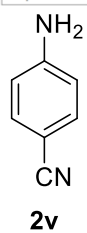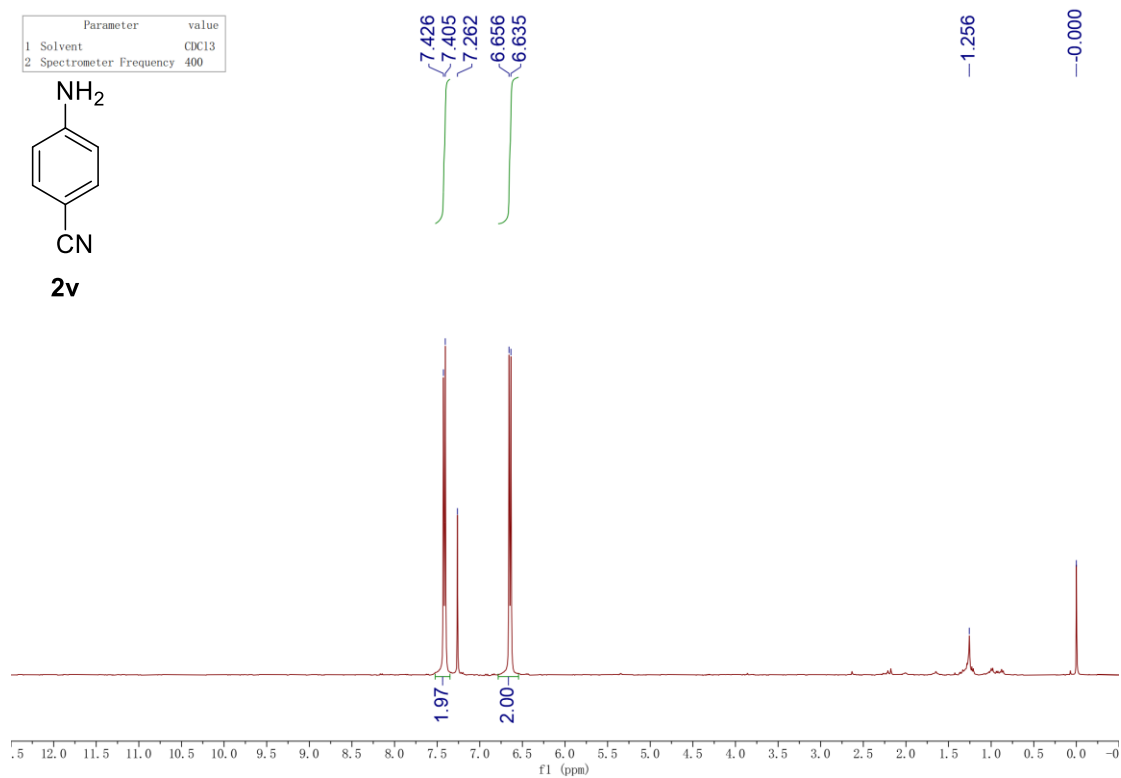

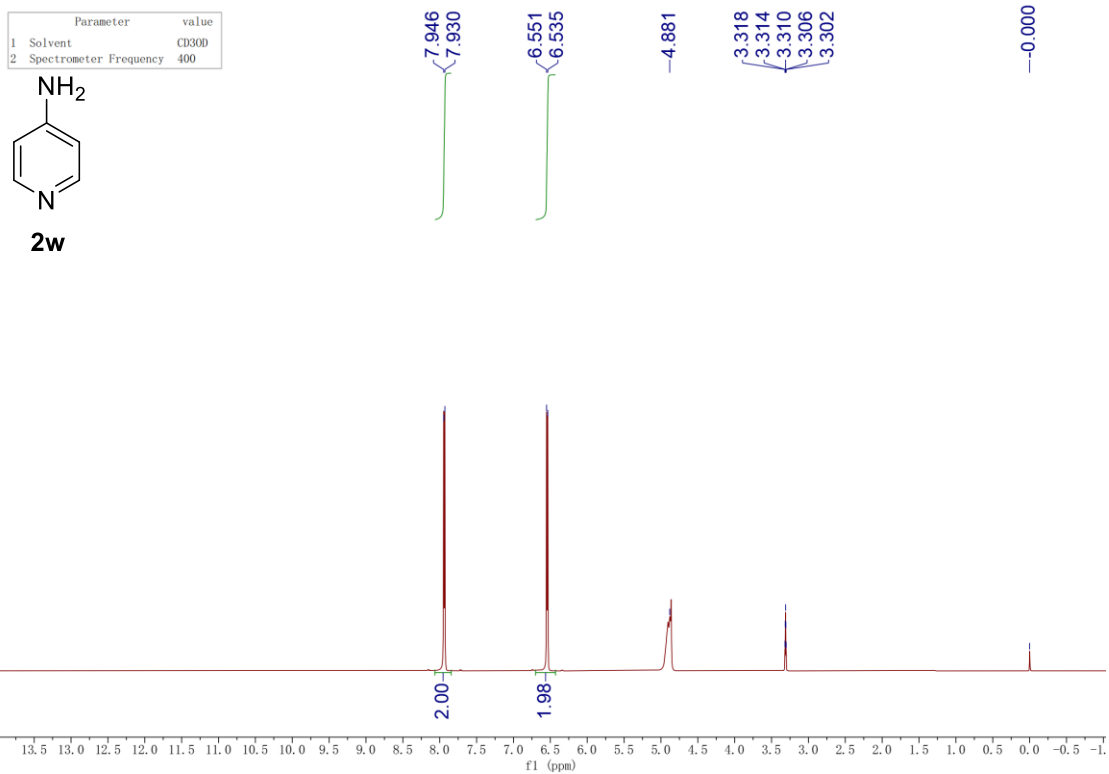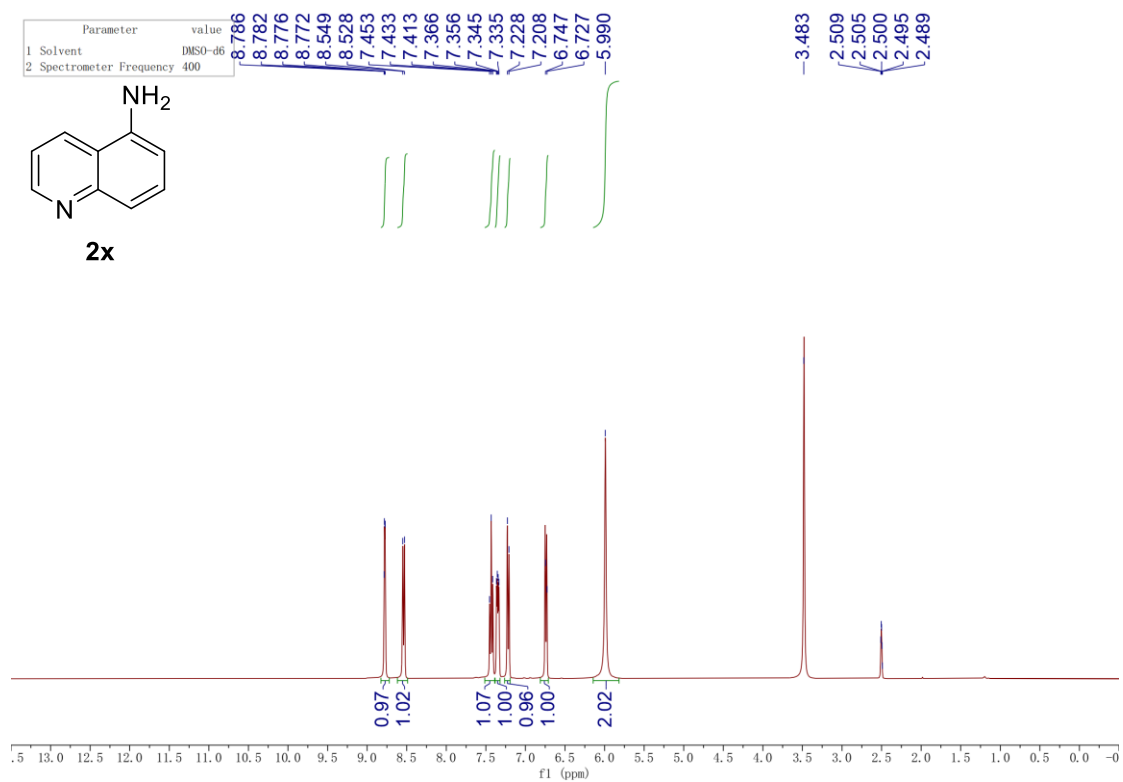

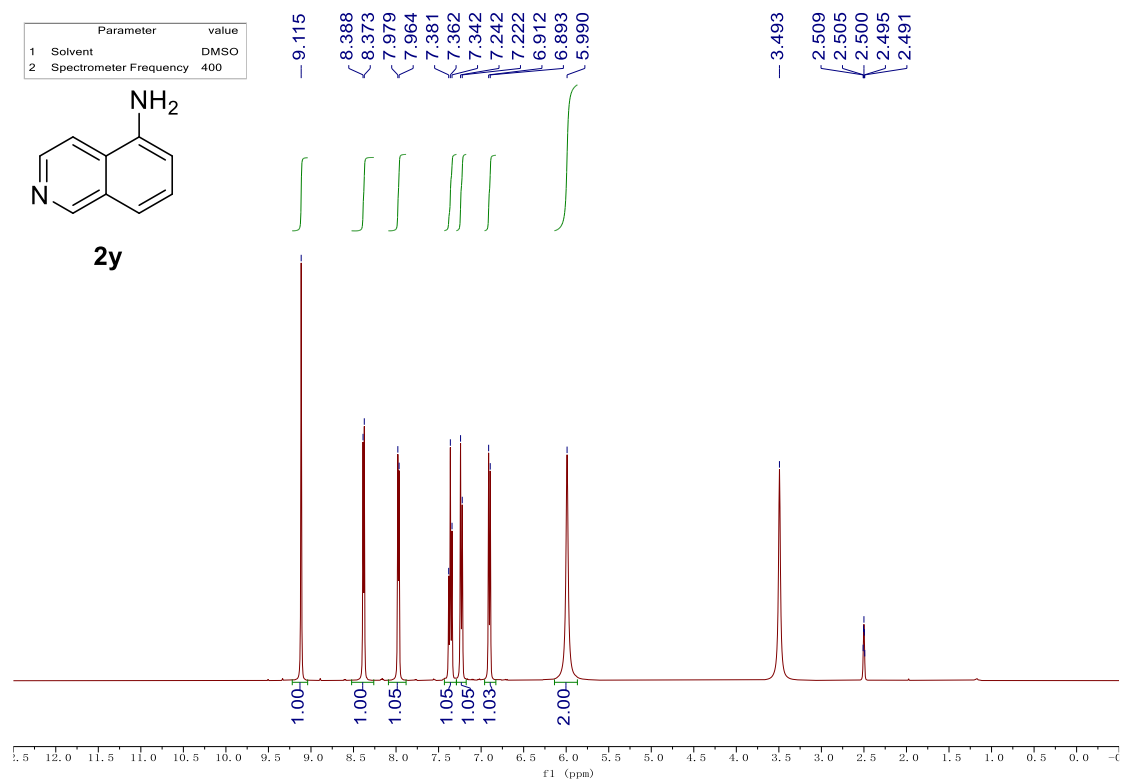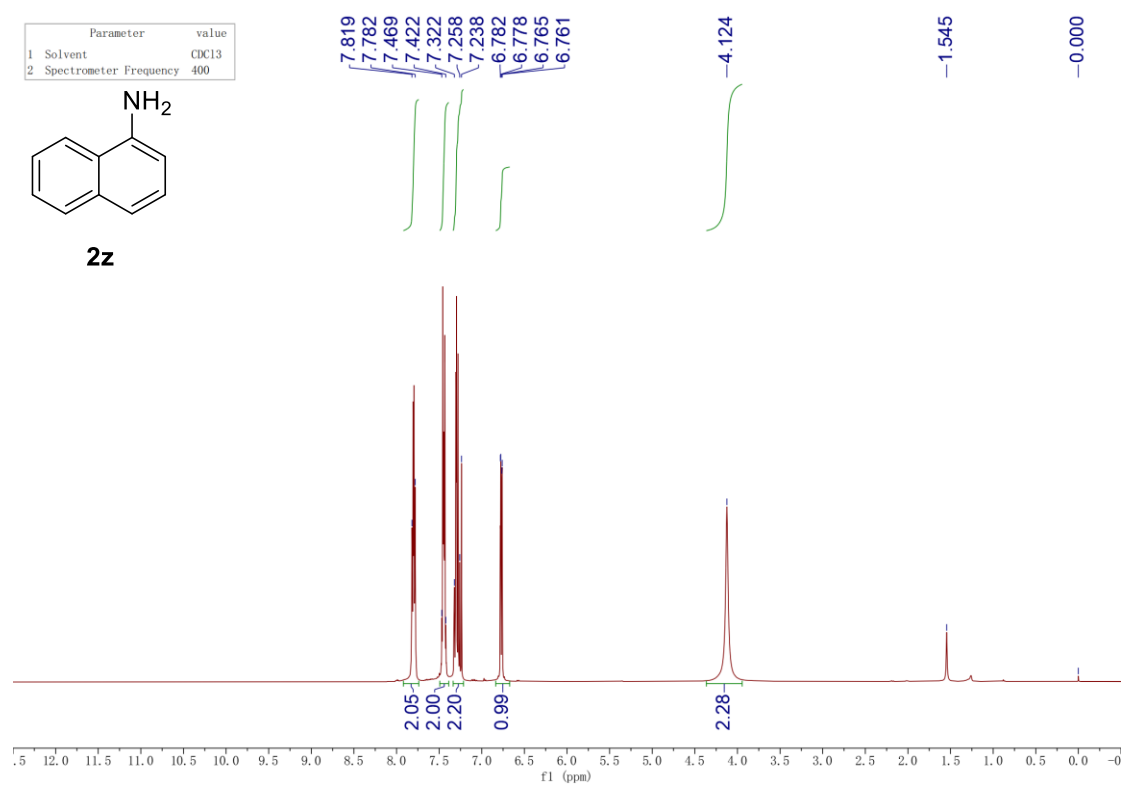

| Parameter                | value             |
|--------------------------|-------------------|
| 1 Solvent                | CDCl <sub>3</sub> |
| 2 Spectrometer Frequency | 400               |

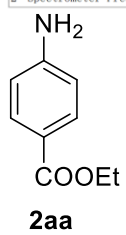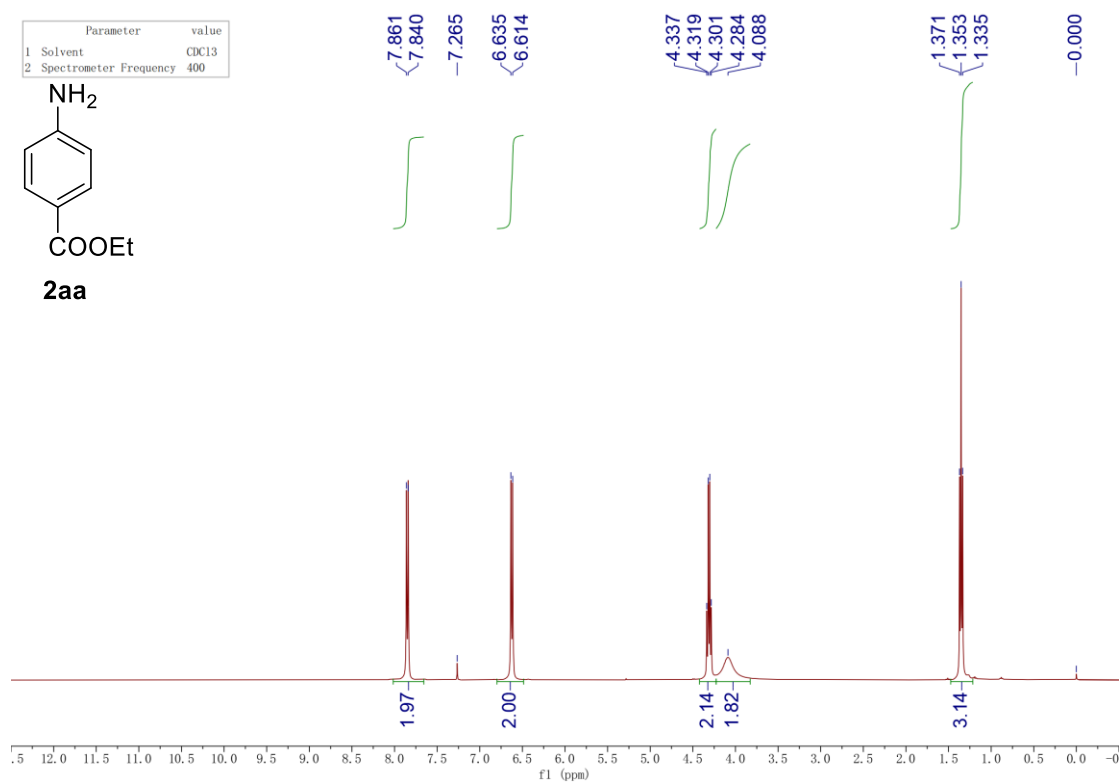

| Parameter                | value               |
|--------------------------|---------------------|
| 1 Solvent                | DMSO-d <sub>6</sub> |
| 2 Spectrometer Frequency | 400                 |

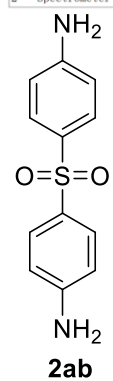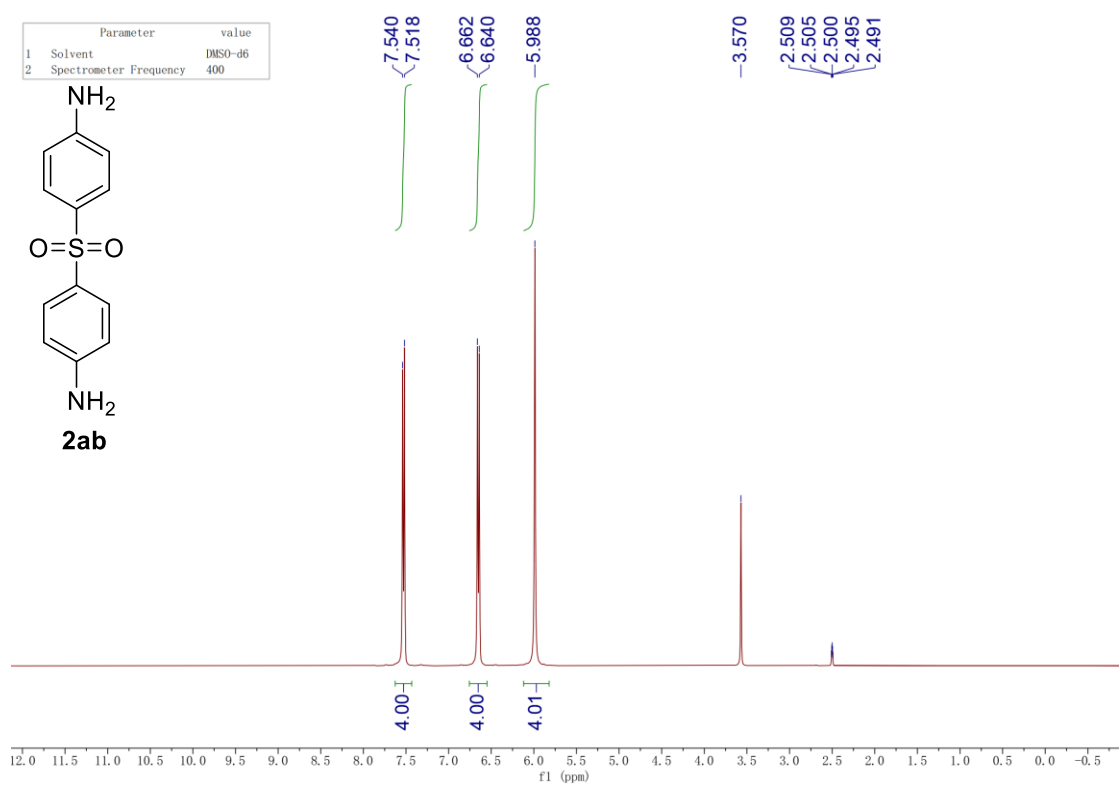



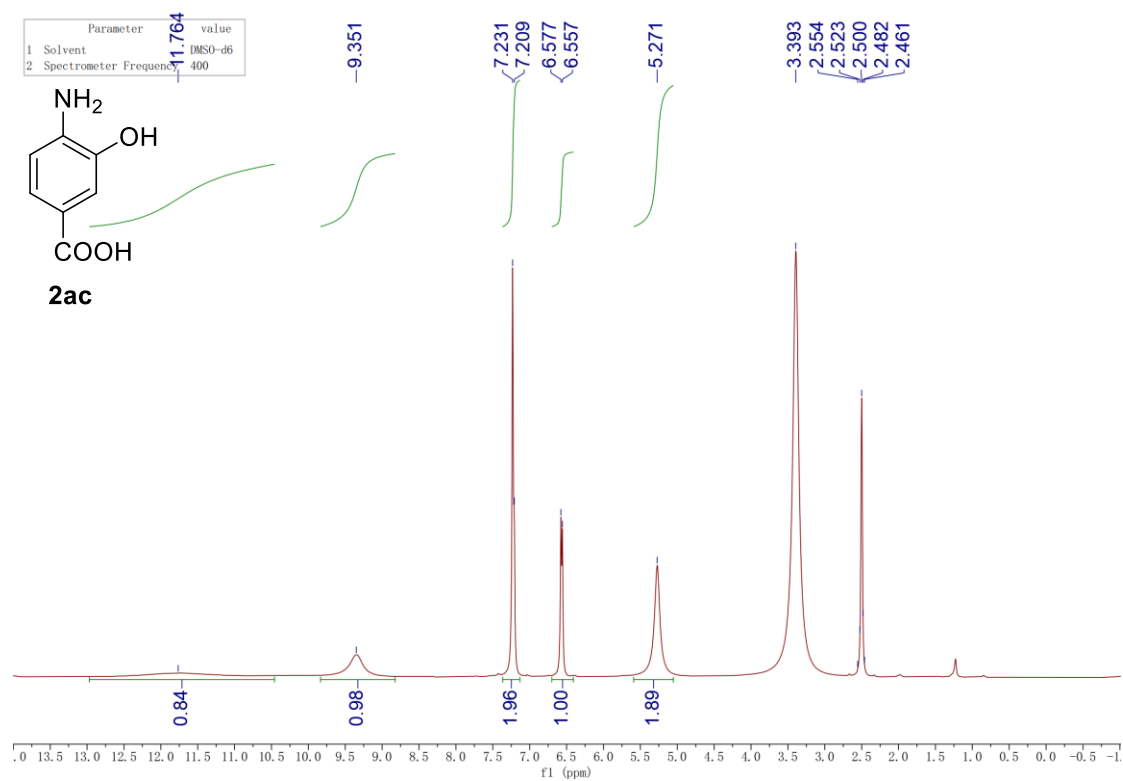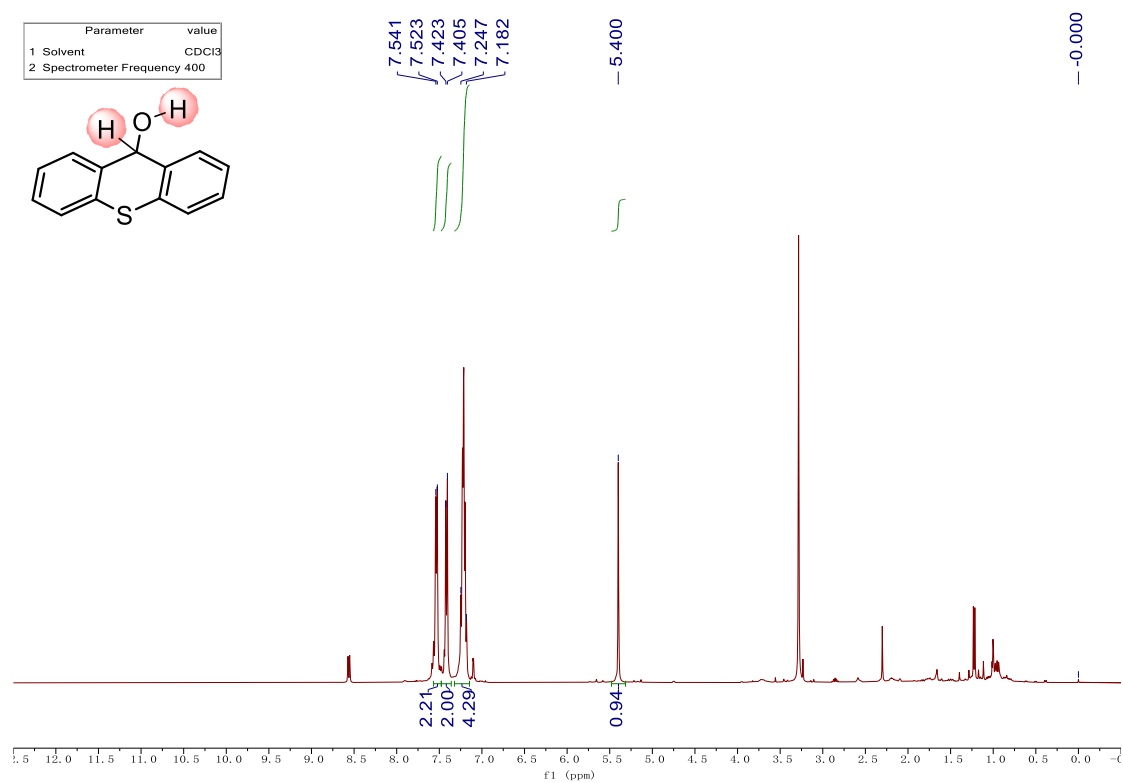

| Parameter                | value |
|--------------------------|-------|
| 1 Solvent                | CDCl3 |
| 2 Spectrometer Frequency | 400   |

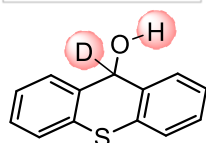

47% D

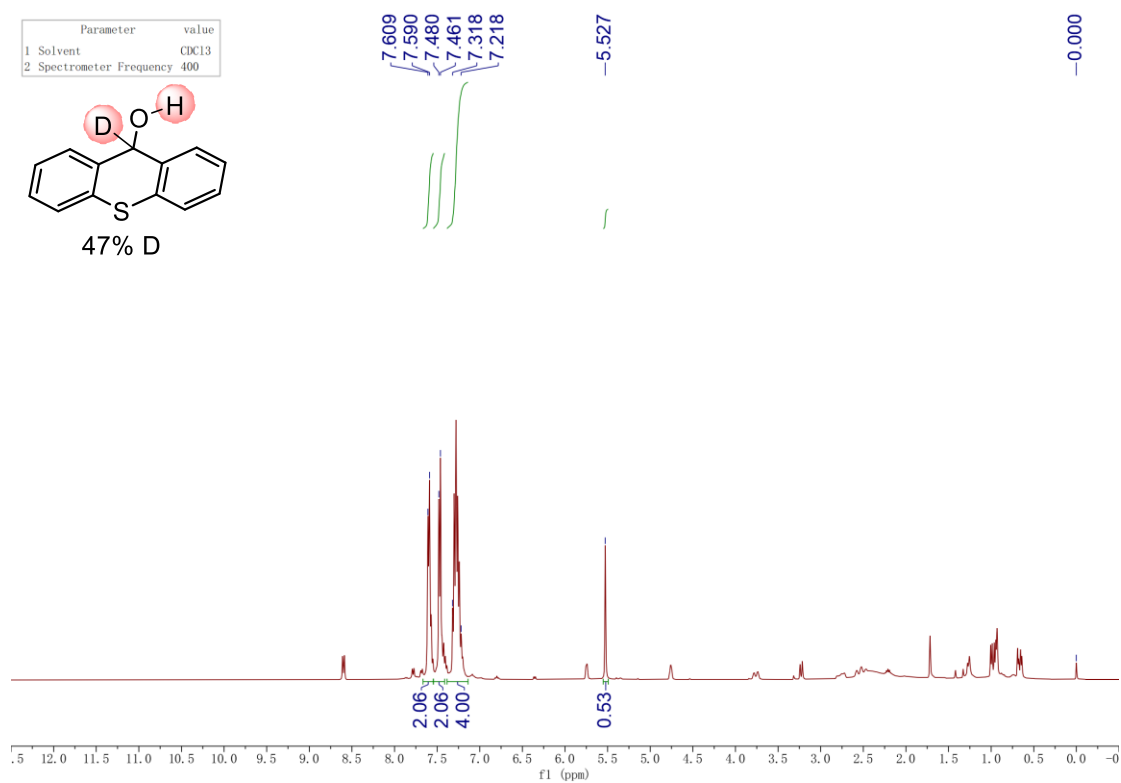

## References

- (1) W. M. Seganish and P. DeShong, Preparation and Palladium-Catalyzed Cross-Coupling of Aryl Triethylammonium Bis(catechol) Silicates with Aryl Triflates, *J. Org. Chem.*, 2004, **69**, 1137-1143.
- (2) R. Kancherla, K. Muralirajan, S. Dutta, K. Pal, B. Li, B. Maity, L. Cavallo and M. Rueping, Photoexcitation of Distinct Divalent Palladium Complexes in Cross-Coupling Amination Under Air, *Angew. Chem. Int. Ed.*, 2024, **63**, e202314508.
- (3) Y. Liu, Y. Sun, Y. Deng and Y. Qiu, Electrochemical Amination of Aryl Halides with NH<sub>3</sub>, *Angew. Chem. Int. Ed.*, 2025, **64**, e202504459.
- (4) S. Yang, M. He, Y. Wang, M. Bao and X. Yu, Visible-Light-Induced Iron-Catalyzed Reduction of Nitroarenes to Anilines, *Chem. Commun.*, 2023, **59**, 14177-14180.
- (5) M. Bagheri Natanzi, F. Kazemi, Z. Zand and B. Kaboudin, Highly Chemoselective and Fast Practical Visible Photoreduction of Nitroaromatic Compounds to Aromatic Amines and Amides Using a Self-assembled Triad TiO<sub>2</sub>-TEOA-NC (LMCT/EDA) Complex System, *Green Chem.*, 2024, **26**, 1637-1652.
- (6) Y. Chen, S. Hao, L. Yin, X. Song, Z. Liu, M. Li and L. Dang, Metal-Free Cascade Reactions for One-Pot Tetrahydroquinoxaline Construction through Nitroarene Reduction and Imine Hydrogenation with Water, *New J. Chem.*, 2024, **48**, 6103-6108.
- (7) X. Wang, Y. Xu, F. Mo, G. Ji, D. Qiu, J. Feng, Y. Ye, S. Zhang, Y. Zhang and J. Wang, Silver-Mediated Trifluoromethylation of Aryldiazonium Salts: Conversion of Amino Group into Trifluoromethyl Group, *J. Am. Chem. Soc.*, 2013, **135**, 10330-10333.
- (8) X. Liu, C. Wang, J. Meng, X. Yue, Q. Wang, J. Lu, J. Wang, X. Wang, Y. Zong and X. Jiang, Single-Atom Cobalt Catalysts for Chemoselective Hydrogenation of Nitroarenes to Anilines, *Chin. Chem. Lett.*, 2023, **34**, 108745.
- (9) J. Huang, X. Li, X. Zhao, Y. Wei and L. Xu, Electrochemically enabled nickel-catalyzed controllable synthesis of monoaryl or diaryl amines from aryl halides and trimethylsilyl azides, *Green Chem.*, 2025, **27**, 5265-5272.
- (10) H. Bao and L. Wang, Photoinduced Reduction of Nitroarenes and Tandem C–N

Cross-Coupling with Haloarenes, *Org. Lett.*, 2023, **25**, 8872-8876.

(11) Y.-F. Zhang, E. Schulz and M. Mellah, Electrocatalytic, Sm-Promoted Synthesis of Aminoarenes from Nitroaromatic Derivatives in MeOH, *ChemCatChem*, 2024, **16**, e202400303.

(12) R. R. Behera, S. Panda, R. Ghosh, A. A. Kumar and B. Bagh, Manganese-Catalyzed Chemoselective Hydrosilylation of Nitroarenes: Sustainable Route to Aromatic Amines, *Org. Lett.*, 2022, **24**, 9179-9183.

(13) D. Gaikwad, R. Chatterjee and A. N. Acharya, Dandela, R. An Alternative Synthetic Approach for the Construction of Tafamidis Analogues and its Novel Derivatives, *J. Indian Chem. Soc.*, 2025, **10**, 101739.

(14) P. G. Cozzi and L. A. Zoli, Rational Approach towards the Nucleophilic Substitutions of Alcohols “on Water”, *Angew. Chem. Int. Ed.*, 2008, **47**, 4162-4166.
